# Supplementary material for: Nonlinear causal effects of estimated glomerular filtration rate on myocardial infarction risks: Mendelian randomization study
Source: Springer Nature journal article supplement (doi:10.1186/s12916-022-02251-1), 2022-02-03
Supplement: MOESM1 [file 20098008]

**Nonlinear causal effects of estimated glomerular filtration rate on myocardial infarction risks: A Mendelian randomization study**

Park et al.

**Supplemental Material Table of Contents**

**Supplemental Methods.**

**Supplemental Figure 1.** Distribution of the phenotypical eGFR values and allele scores for log-transformed eGFR.

**Supplemental Table 1.** Genetic instruments for log-transformed eGFR based on creatinine levels.

**Supplemental Table 2.** Genetic instruments for log-transformed eGFR based on cystatin C levels.

**Supplemental Table 3.** Localized averaged causal estimates calculated from 100 percentile ranges of strata according to the instrument-free exposure.

## **Supplemental Methods.**

### ***Data collection in the UK Biobank***

The information of the data from the UK Biobank consortium are available online (URL: <https://www.ukbiobank.ac.uk/data-showcase/>), and the information is identified by field IDs.

Baseline eGFR values were calculated from the information of serum creatinine levels (Field ID 30700), cystatin C levels (Field ID 10720), or both, along with information of ethnicity (Field ID 21000), calculated by the CKD-EPI equation.

Other information was collected by as follows: age (Field ID 21003). sex (Field ID 31), body mass index (Field ID 21001), total cholesterol (Field ID 30690), HDL cholesterol (Field ID 30760), LDL cholesterol (Field ID 30780). Medication histories for hypertension or dyslipidemia (Field ID 6177 and 6153) were collected. Systolic and diastolic BP was determined by the average of two automated measurements (Field ID 4080 and Field ID 4079), and those with a single missing measurement were considered to have missing information. A history of diabetes mellitus was collected by self-reports (Field ID 2443). Glycated hemoglobin A1c levels (Field ID 30750) and urine albuminuria values (Field ID 30500) were also collected.

### ***Methods for conventional summary-level MR analysis***

The SNPs which overlapped with the outcome data were included in the conventional MR analysis under linearity assumption. Multiplicative random-effects inverse variance weighted method was used to yield the main causal estimates. MR-Egger regression was performed with calculation of MR-Egger intercept P value which is used to investigate the presence of significant directional pleiotropic effect. As MR-Egger regression can still be biased from violation of the InSIDE assumption, weighted-median method was implemented as another pleiotropy-robust sensitivity analysis. Weighted-median method has strength as the method can calculate valid causal estimates even half of the instrumented weights are invalid. The unit of the causal estimates were from an exponential increase in eGFR on log-odds for MI. All of the above commonly performed summary-level methods assume a linearity relation between exposure and outcome and cannot reflect non-linearity.

**Supplemental Figure 1.** Distribution of the phenotypical eGFR values and allele scores for log-transformed eGFR.

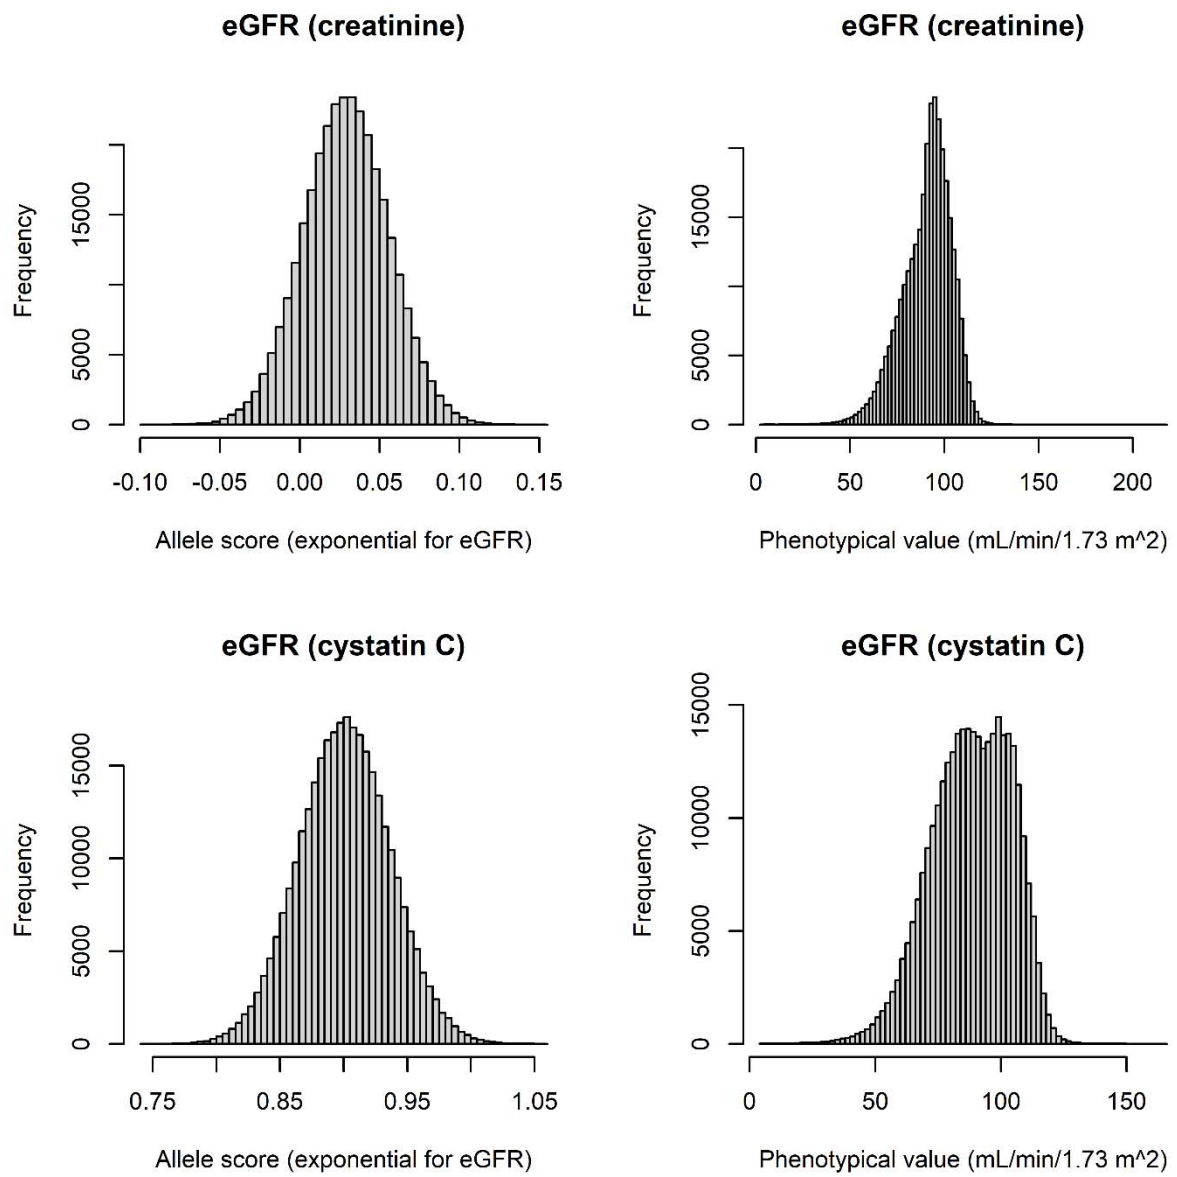

Supplemental Table 1. Genetic instruments for log-transformed eGFR based on creatinine levels.

| Basic information |               |              | Variant filter                                     | Exposure                           |        |      |          | eGFR (cystatin C) |       |           |
|-------------------|---------------|--------------|----------------------------------------------------|------------------------------------|--------|------|----------|-------------------|-------|-----------|
| RSID              | effect allele | other allele |                                                    | eGFR (log-transformed, creatinine) |        |      |          | beta              | se    | pval      |
|                   |               |              | Irrelevant/weak association with eGFR (cystatin C) | beta                               | se     | eaf  | pval     |                   |       |           |
| rs1458038         | T             | C            |                                                    | 0.0032                             | 0.0004 | 0.3  | 3.60E-17 | 0.247             | 0.042 | 5.50E-09  |
| rs2954017         | T             | C            |                                                    | 0.0026                             | 0.0004 | 0.46 | 3.20E-11 | 0.180             | 0.038 | 2.97E-06  |
| rs10774625        | A             | G            |                                                    | -0.002                             | 0.0003 | 0.48 | 1.80E-08 | -0.996            | 0.038 | 1.11E-148 |
| rs780094          | T             | C            |                                                    | 0.0046                             | 0.0004 | 0.38 | 4.20E-38 | 0.308             | 0.039 | 5.54E-15  |
| rs77924615        | A             | G            |                                                    | 0.0096                             | 0.0005 | 0.2  | 1.20E-99 | 1.025             | 0.049 | 6.38E-99  |
| rs154656          | A             | T            |                                                    | -0.0031                            | 0.0003 | 0.44 | 1.30E-18 | -0.262            | 0.039 | 1.70E-11  |
| rs17696736        | A             | G            |                                                    | 0.002                              | 0.0004 | 0.57 | 9.70E-09 | 0.820             | 0.039 | 2.52E-99  |
| rs7188071         | T             | C            | TRUE                                               | 0.0024                             | 0.0004 | 0.36 | 8.60E-12 | -0.109            | 0.040 | 6.62E-03  |
| rs10098664        | T             | C            | TRUE                                               | -0.0024                            | 0.0004 | 0.51 | 6.00E-11 | -0.070            | 0.039 | 7.00E-02  |
| rs10838702        | T             | G            |                                                    | -0.0023                            | 0.0004 | 0.38 | 6.30E-11 | -0.223            | 0.039 | 1.65E-08  |
| rs112545201       | T             | C            |                                                    | -0.0042                            | 0.0005 | 0.13 | 8.80E-17 | -0.242            | 0.056 | 1.55E-05  |
| rs2411192         | A             | T            |                                                    | -0.0024                            | 0.0003 | 0.59 | 5.80E-12 | -0.234            | 0.039 | 2.24E-09  |
| rs10096421        | T             | G            | TRUE                                               | 0.002                              | 0.0004 | 0.47 | 1.50E-08 | 0.125             | 0.039 | 1.20E-03  |
| rs4625            | A             | G            |                                                    | -0.0023                            | 0.0004 | 0.68 | 4.30E-10 | -0.246            | 0.042 | 3.49E-09  |
| rs223308          | A             | G            |                                                    | -0.0027                            | 0.0003 | 0.52 | 3.00E-15 | -0.371            | 0.038 | 4.18E-22  |
| rs10224002        | A             | G            |                                                    | 0.0068                             | 0.0004 | 0.72 | 2.70E-66 | 0.851             | 0.042 | 3.37E-90  |
| rs3134605         | T             | C            |                                                    | 0.0033                             | 0.0004 | 0.8  | 2.80E-13 | 0.444             | 0.046 | 1.03E-21  |
| rs11784052        | T             | C            | TRUE                                               | 0.0027                             | 0.0004 | 0.46 | 9.80E-15 | 0.126             | 0.039 | 1.07E-03  |
| rs11227260        | T             | G            |                                                    | -0.0032                            | 0.0004 | 0.35 | 4.50E-19 | -0.512            | 0.041 | 1.23E-36  |
| rs7592697         | T             | C            | TRUE                                               | -0.002                             | 0.0004 | 0.65 | 3.20E-08 | -0.006            | 0.040 | 8.74E-01  |
| rs72683923        | T             | C            | TRUE                                               | -0.0076                            | 0.0014 | 0.98 | 2.00E-08 | 0.222             | 0.137 | 1.06E-01  |
| rs7832708         | T             | C            | TRUE                                               | 0.0023                             | 0.0004 | 0.49 | 2.40E-10 | 0.092             | 0.038 | 1.64E-02  |
| rs9828976         | C             | G            |                                                    | -0.0024                            | 0.0004 | 0.75 | 2.00E-09 | -0.349            | 0.045 | 9.32E-15  |
| rs6029640         | A             | G            | TRUE                                               | -0.0021                            | 0.0004 | 0.58 | 7.00E-09 | -0.109            | 0.039 | 5.27E-03  |
| rs35004449        | T             | G            | TRUE                                               | 0.0027                             | 0.0004 | 0.27 | 2.60E-12 | 0.093             | 0.044 | 3.41E-02  |
| rs3905668         | A             | G            |                                                    | -0.0025                            | 0.0004 | 0.72 | 2.80E-11 | -0.398            | 0.043 | 1.87E-20  |
| rs281380          | T             | C            |                                                    | -0.0022                            | 0.0004 | 0.63 | 1.90E-09 | -0.157            | 0.040 | 8.74E-05  |
| rs144100226       | T             | C            | TRUE                                               | 0.006                              | 0.0011 | 0.04 | 1.30E-08 | 0.282             | 0.091 | 1.96E-03  |
| rs1910738         | T             | G            | TRUE                                               | 0.0023                             | 0.0004 | 0.71 | 1.20E-08 | 0.026             | 0.043 | 5.49E-01  |
| rs12207180        | A             | T            | TRUE                                               | -0.0085                            | 0.0005 | 0.12 | 1.20E-56 | -0.080            | 0.057 | 1.59E-01  |
| rs78614739        | T             | C            | TRUE                                               | 0.0026                             | 0.0005 | 0.17 | 2.10E-08 | -0.104            | 0.052 | 4.56E-02  |
| rs2823139         | A             | G            |                                                    | -0.0027                            | 0.0004 | 0.34 | 1.00E-13 | -0.387            | 0.041 | 1.95E-21  |
| rs7012814         | A             | G            | TRUE                                               | 0.0025                             | 0.0004 | 0.47 | 1.80E-12 | 0.064             | 0.039 | 9.94E-02  |
| rs1543238         | A             | G            | TRUE                                               | -0.0025                            | 0.0004 | 0.53 | 3.20E-12 | -0.125            | 0.039 | 1.25E-03  |
| rs11657044        | T             | C            |                                                    | -0.0075                            | 0.0005 | 0.17 | 5.30E-60 | -0.310            | 0.052 | 2.64E-09  |
| rs1051447         | A             | C            | TRUE                                               | 0.0021                             | 0.0004 | 0.71 | 2.60E-08 | 0.021             | 0.042 | 6.21E-01  |
| rs2068888         | A             | G            |                                                    | -0.0026                            | 0.0003 | 0.45 | 6.30E-14 | -0.327            | 0.039 | 1.92E-17  |
| rs881858          | A             | G            |                                                    | -0.0056                            | 0.0004 | 0.7  | 1.10E-49 | -0.628            | 0.041 | 1.15E-51  |
| rs419291          | T             | C            | TRUE                                               | 0.0021                             | 0.0004 | 0.39 | 4.10E-09 | 0.106             | 0.040 | 8.21E-03  |
| rs12920176        | A             | C            |                                                    | -0.0026                            | 0.0004 | 0.59 | 2.40E-13 | -0.278            | 0.039 | 1.13E-12  |
| rs6921580         | C             | G            |                                                    | 0.0027                             | 0.0004 | 0.41 | 1.60E-14 | 0.238             | 0.039 | 1.01E-09  |
| rs56140069        | A             | T            |                                                    | 0.0025                             | 0.0005 | 0.82 | 2.70E-08 | 0.361             | 0.050 | 3.01E-13  |
| rs6492982         | T             | C            |                                                    | -0.0032                            | 0.0004 | 0.55 | 5.80E-19 | -0.251            | 0.039 | 9.61E-11  |
| rs3111316         | A             | G            | TRUE                                               | -0.0019                            | 0.0004 | 0.59 | 4.90E-08 | 0.036             | 0.039 | 3.55E-01  |
| rs72817412        | T             | C            |                                                    | 0.0049                             | 0.0009 | 0.05 | 1.50E-08 | 0.792             | 0.090 | 1.79E-18  |
| rs2792796         | T             | C            |                                                    | -0.0021                            | 0.0004 | 0.61 | 3.10E-09 | -0.195            | 0.039 | 6.75E-07  |
| rs55759218        | A             | G            |                                                    | -0.0039                            | 0.0004 | 0.27 | 6.10E-24 | -0.466            | 0.043 | 1.10E-27  |
| rs2267372         | A             | G            |                                                    | 0.0024                             | 0.0004 | 0.4  | 1.20E-11 | 0.220             | 0.039 | 2.01E-08  |
| rs1047891         | A             | C            | TRUE                                               | -0.0065                            | 0.0004 | 0.31 | 3.60E-64 | 0.430             | 0.041 | 2.13E-25  |

|             |   |   |      |         |        |      |          |        |       |          |
|-------------|---|---|------|---------|--------|------|----------|--------|-------|----------|
| rs4808154   | T | C | TRUE | 0.0026  | 0.0004 | 0.71 | 7.80E-09 | 0.005  | 0.042 | 9.11E-01 |
| rs4410790   | T | C | TRUE | -0.0023 | 0.0004 | 0.37 | 1.90E-10 | -0.148 | 0.040 | 2.01E-04 |
| rs7974833   | T | C |      | -0.0032 | 0.0004 | 0.76 | 4.00E-15 | -0.452 | 0.045 | 1.28E-23 |
| rs17413465  | A | C | TRUE | 0.0025  | 0.0004 | 0.18 | 1.40E-08 | 0.101  | 0.049 | 3.98E-02 |
| rs6971211   | T | C |      | -0.0029 | 0.0004 | 0.41 | 3.10E-15 | -0.330 | 0.042 | 2.85E-15 |
| rs2472297   | T | C |      | 0.0039  | 0.0004 | 0.26 | 8.20E-20 | 0.313  | 0.043 | 4.92E-13 |
| rs1268176   | A | G |      | 0.0027  | 0.0004 | 0.34 | 7.10E-14 | 0.173  | 0.041 | 2.64E-05 |
| rs3925584   | T | C |      | -0.0055 | 0.0003 | 0.55 | 3.00E-56 | -0.596 | 0.038 | 3.49E-54 |
| rs1028455   | A | T | TRUE | 0.0021  | 0.0004 | 0.33 | 1.90E-08 | 0.110  | 0.041 | 7.33E-03 |
| rs688540    | A | G |      | -0.0031 | 0.0006 | 0.87 | 2.30E-08 | -0.305 | 0.056 | 4.35E-08 |
| rs6484504   | T | C |      | -0.0032 | 0.0004 | 0.28 | 1.20E-16 | -0.248 | 0.043 | 7.59E-09 |
| rs363092    | A | C | TRUE | -0.0022 | 0.0004 | 0.42 | 5.60E-10 | 0.031  | 0.039 | 4.28E-01 |
| rs1377164   | T | C | TRUE | 0.0034  | 0.0004 | 0.21 | 9.80E-16 | -0.046 | 0.047 | 3.30E-01 |
| rs2490391   | A | C |      | -0.0025 | 0.0003 | 0.46 | 5.50E-13 | -0.250 | 0.039 | 9.49E-11 |
| rs3845534   | A | G |      | -0.0019 | 0.0003 | 0.49 | 3.90E-08 | -0.248 | 0.038 | 1.15E-10 |
| rs9907229   | T | C |      | -0.0049 | 0.0005 | 0.85 | 6.80E-24 | -0.646 | 0.054 | 1.97E-32 |
| rs736820    | A | G |      | -0.0021 | 0.0004 | 0.37 | 5.30E-09 | -0.154 | 0.040 | 1.04E-04 |
| rs13230509  | C | G |      | -0.0055 | 0.0004 | 0.69 | 4.00E-37 | -0.642 | 0.043 | 8.48E-51 |
| rs6722113   | A | G | TRUE | -0.0022 | 0.0004 | 0.34 | 1.30E-08 | -0.150 | 0.041 | 2.72E-04 |
| rs1635404   | T | G | TRUE | -0.0024 | 0.0004 | 0.7  | 2.50E-10 | -0.148 | 0.042 | 3.68E-04 |
| rs325442    | A | G |      | 0.0021  | 0.0003 | 0.4  | 3.00E-09 | 0.272  | 0.039 | 2.89E-12 |
| rs17462630  | C | G |      | 0.0024  | 0.0004 | 0.34 | 4.30E-09 | 0.395  | 0.041 | 2.06E-22 |
| rs112880707 | T | C | TRUE | 0.0056  | 0.0006 | 0.11 | 6.70E-23 | 0.042  | 0.066 | 5.30E-01 |
| rs2337143   | A | G |      | -0.0021 | 0.0004 | 0.34 | 5.60E-09 | -0.173 | 0.041 | 2.34E-05 |
| rs11564722  | T | C |      | 0.0038  | 0.0004 | 0.24 | 1.40E-18 | 0.458  | 0.046 | 1.07E-23 |
| rs1913641   | T | G | TRUE | -0.002  | 0.0003 | 0.48 | 4.80E-09 | -0.077 | 0.038 | 4.35E-02 |
| rs7169629   | C | G | TRUE | 0.0019  | 0.0003 | 0.52 | 2.40E-08 | 0.083  | 0.038 | 3.01E-02 |
| rs9838792   | A | G | TRUE | 0.0031  | 0.0004 | 0.39 | 4.80E-19 | 0.006  | 0.039 | 8.77E-01 |
| rs62257807  | T | C |      | -0.0046 | 0.0008 | 0.06 | 2.90E-08 | -0.400 | 0.077 | 2.22E-07 |
| rs2634675   | A | G | TRUE | 0.0028  | 0.0004 | 0.46 | 5.30E-13 | 0.029  | 0.039 | 4.47E-01 |
| rs10964603  | T | C | TRUE | -0.0025 | 0.0004 | 0.78 | 7.80E-09 | -0.160 | 0.047 | 6.72E-04 |
| rs79760705  | T | G |      | 0.0056  | 0.0006 | 0.11 | 2.60E-24 | 0.465  | 0.061 | 1.74E-14 |
| rs632887    | A | G | TRUE | 0.0033  | 0.0004 | 0.59 | 1.10E-20 | 0.008  | 0.039 | 8.37E-01 |
| rs407102    | T | C | TRUE | 0.0031  | 0.0004 | 0.7  | 3.80E-16 | 0.082  | 0.042 | 5.21E-02 |
| rs9375694   | A | G |      | 0.0026  | 0.0004 | 0.7  | 4.60E-12 | 0.191  | 0.042 | 4.77E-06 |
| rs9807656   | T | C | TRUE | -0.0034 | 0.0006 | 0.9  | 3.80E-09 | 0.006  | 0.064 | 9.26E-01 |
| rs7127946   | T | C | TRUE | 0.0023  | 0.0004 | 0.72 | 1.80E-09 | 0.132  | 0.042 | 1.74E-03 |
| rs1887252   | C | G |      | -0.0029 | 0.0004 | 0.64 | 7.40E-16 | -0.314 | 0.040 | 4.29E-15 |
| rs62257555  | A | G |      | 0.0048  | 0.0009 | 0.94 | 2.60E-08 | 0.392  | 0.080 | 8.81E-07 |
| rs80576     | A | G | TRUE | -0.0027 | 0.0005 | 0.16 | 1.00E-08 | -0.187 | 0.051 | 2.65E-04 |
| rs4886699   | A | C |      | 0.0031  | 0.0004 | 0.75 | 4.00E-15 | 0.309  | 0.044 | 2.47E-12 |
| rs168505    | T | C |      | -0.0027 | 0.0004 | 0.4  | 2.20E-14 | -0.278 | 0.039 | 1.54E-12 |
| rs499600    | T | G |      | -0.0037 | 0.0005 | 0.15 | 8.90E-15 | -0.444 | 0.052 | 2.56E-17 |
| rs12163971  | A | C | TRUE | -0.0032 | 0.0005 | 0.16 | 4.30E-12 | 0.010  | 0.052 | 8.49E-01 |
| rs2509851   | A | C | TRUE | 0.0021  | 0.0004 | 0.63 | 1.60E-09 | 0.117  | 0.040 | 3.17E-03 |
| rs66473811  | T | C | TRUE | 0.0031  | 0.0005 | 0.84 | 2.00E-10 | 0.128  | 0.052 | 1.30E-02 |
| rs6667182   | T | C |      | -0.0043 | 0.0004 | 0.32 | 2.20E-23 | -0.288 | 0.041 | 3.58E-12 |
| rs76215063  | T | C | TRUE | -0.0041 | 0.0007 | 0.92 | 2.60E-09 | -0.117 | 0.079 | 1.36E-01 |
| rs6779368   | A | G | TRUE | 0.0033  | 0.0004 | 0.66 | 8.80E-16 | 0.002  | 0.040 | 9.51E-01 |
| rs8096658   | C | G |      | 0.0046  | 0.0004 | 0.51 | 1.80E-29 | 0.419  | 0.039 | 3.70E-27 |
| rs11951093  | A | G |      | -0.0056 | 0.0004 | 0.42 | 2.00E-54 | -0.349 | 0.039 | 5.59E-19 |
| rs6948759   | T | C | TRUE | -0.0026 | 0.0004 | 0.21 | 1.00E-09 | -0.177 | 0.048 | 2.48E-04 |
| rs7543734   | C | G |      | 0.0031  | 0.0005 | 0.2  | 9.60E-11 | 0.201  | 0.048 | 2.31E-05 |
| rs10430743  | T | G |      | 0.0025  | 0.0003 | 0.43 | 2.90E-13 | 0.461  | 0.039 | 1.19E-32 |
| rs72841902  | A | T | TRUE | 0.0022  | 0.0004 | 0.29 | 3.60E-09 | 0.016  | 0.043 | 7.07E-01 |
| rs10122824  | T | G | TRUE | -0.0024 | 0.0004 | 0.34 | 2.80E-10 | 0.244  | 0.041 | 2.21E-09 |
| rs7084764   | A | G | TRUE | 0.0026  | 0.0003 | 0.5  | 2.90E-14 | 0.141  | 0.038 | 2.46E-04 |

|             |   |   |      |         |        |      |           |        |       |           |
|-------------|---|---|------|---------|--------|------|-----------|--------|-------|-----------|
| rs7651407   | T | C |      | 0.0027  | 0.0004 | 0.45 | 1.60E-11  | 0.236  | 0.038 | 8.79E-10  |
| rs3757387   | T | C |      | 0.0029  | 0.0004 | 0.55 | 2.50E-16  | 0.635  | 0.039 | 5.71E-61  |
| rs75267082  | A | T | TRUE | 0.0034  | 0.0006 | 0.89 | 1.10E-09  | 0.144  | 0.061 | 1.78E-02  |
| rs2261092   | A | G | TRUE | -0.0045 | 0.0007 | 0.07 | 1.40E-09  | -0.243 | 0.070 | 5.20E-04  |
| rs12361687  | A | G |      | 0.0021  | 0.0004 | 0.36 | 5.00E-09  | 0.150  | 0.040 | 1.44E-04  |
| rs187355703 | C | G |      | 0.0101  | 0.0011 | 0.97 | 9.50E-19  | 1.261  | 0.122 | 6.70E-25  |
| rs6546869   | A | G |      | 0.0061  | 0.0004 | 0.22 | 1.70E-48  | 0.455  | 0.046 | 6.80E-23  |
| rs4656220   | T | C | TRUE | 0.0021  | 0.0004 | 0.37 | 1.60E-09  | -0.004 | 0.040 | 9.30E-01  |
| rs2365286   | A | G |      | -0.0033 | 0.0004 | 0.74 | 2.10E-17  | -0.360 | 0.044 | 2.76E-16  |
| rs3791221   | A | G |      | 0.0021  | 0.0004 | 0.65 | 3.00E-09  | 0.411  | 0.040 | 1.48E-24  |
| rs303937    | A | T |      | 0.0027  | 0.0004 | 0.41 | 2.90E-14  | 0.438  | 0.039 | 7.77E-29  |
| rs10851885  | A | G |      | 0.005   | 0.0004 | 0.76 | 3.30E-34  | 0.672  | 0.044 | 7.43E-52  |
| rs28817415  | T | C |      | -0.0074 | 0.0003 | 0.44 | 9.70E-104 | -1.118 | 0.038 | 3.25E-186 |
| rs9375818   | A | G | TRUE | -0.0026 | 0.0004 | 0.23 | 3.20E-10  | -0.093 | 0.046 | 4.44E-02  |
| rs6501468   | T | C | TRUE | 0.0024  | 0.0004 | 0.23 | 1.40E-08  | -0.026 | 0.046 | 5.75E-01  |
| rs3812036   | T | C |      | -0.0069 | 0.0004 | 0.26 | 3.20E-64  | -0.782 | 0.045 | 1.08E-67  |
| rs2235826   | A | T | TRUE | -0.0033 | 0.0005 | 0.81 | 3.90E-13  | -0.178 | 0.050 | 3.30E-04  |
| rs2071047   | A | G | TRUE | 0.002   | 0.0003 | 0.41 | 1.10E-08  | 0.143  | 0.039 | 2.60E-04  |
| rs7966357   | C | G |      | 0.0024  | 0.0004 | 0.66 | 6.00E-11  | 0.165  | 0.040 | 3.58E-05  |
| rs6127099   | A | T |      | -0.0051 | 0.0004 | 0.72 | 1.20E-36  | -0.561 | 0.044 | 1.26E-37  |
| rs10865189  | C | G |      | 0.0025  | 0.0004 | 0.47 | 1.00E-12  | 0.237  | 0.039 | 8.53E-10  |
| rs9868185   | A | G |      | 0.0027  | 0.0003 | 0.54 | 1.50E-14  | 0.318  | 0.038 | 1.25E-16  |
| rs816828    | T | C | TRUE | -0.002  | 0.0004 | 0.51 | 2.40E-08  | 0.012  | 0.038 | 7.53E-01  |
| rs988911    | A | G | TRUE | -0.0029 | 0.0005 | 0.13 | 1.40E-08  | 0.037  | 0.056 | 5.17E-01  |
| rs11919484  | T | G |      | -0.0023 | 0.0004 | 0.31 | 4.00E-10  | -0.350 | 0.042 | 3.86E-17  |
| rs11260709  | T | C | TRUE | 0.0024  | 0.0004 | 0.68 | 1.90E-10  | 0.132  | 0.041 | 1.18E-03  |
| rs4794814   | A | G | TRUE | -0.0059 | 0.0004 | 0.75 | 5.00E-49  | -0.117 | 0.044 | 7.98E-03  |
| rs11063193  | T | C |      | 0.0029  | 0.0005 | 0.88 | 4.90E-08  | 0.241  | 0.058 | 3.75E-05  |
| rs1242484   | T | C | TRUE | -0.0025 | 0.0004 | 0.69 | 8.80E-11  | -0.007 | 0.042 | 8.58E-01  |
| rs41284816  | T | G |      | -0.0079 | 0.0012 | 0.03 | 1.60E-10  | -0.643 | 0.142 | 6.16E-06  |
| rs12520984  | C | G | TRUE | 0.0022  | 0.0004 | 0.33 | 2.40E-09  | 0.139  | 0.041 | 7.68E-04  |
| rs71606723  | A | T | TRUE | 0.0029  | 0.0004 | 0.76 | 9.30E-13  | 0.087  | 0.046 | 6.02E-02  |
| rs80282103  | A | T |      | 0.0081  | 0.0006 | 0.92 | 2.60E-37  | 0.838  | 0.070 | 2.03E-33  |
| rs284859    | T | G | TRUE | 0.0027  | 0.0004 | 0.19 | 1.50E-09  | 0.176  | 0.050 | 4.68E-04  |
| rs7185391   | T | G | TRUE | -0.0026 | 0.0004 | 0.29 | 1.20E-11  | -0.024 | 0.043 | 5.83E-01  |
| rs700753    | C | G |      | 0.0033  | 0.0004 | 0.34 | 7.50E-20  | 0.454  | 0.040 | 1.88E-29  |
| rs956006    | T | C | TRUE | 0.0022  | 0.0004 | 0.34 | 5.70E-09  | 0.113  | 0.041 | 5.76E-03  |
| rs12913015  | T | C |      | 0.0028  | 0.0004 | 0.44 | 4.60E-15  | 0.295  | 0.039 | 2.83E-14  |
| rs12989250  | A | G |      | -0.0026 | 0.0004 | 0.31 | 1.20E-11  | -0.299 | 0.042 | 9.02E-13  |
| rs11694902  | A | G |      | 0.0041  | 0.0005 | 0.14 | 2.10E-16  | 0.452  | 0.055 | 3.17E-16  |
| rs7838146   | T | C |      | -0.0021 | 0.0004 | 0.36 | 1.20E-08  | -0.273 | 0.040 | 9.26E-12  |
| rs7514450   | T | C |      | 0.0022  | 0.0003 | 0.43 | 1.50E-10  | 0.150  | 0.039 | 1.16E-04  |
| rs1783827   | A | G | TRUE | -0.0021 | 0.0004 | 0.57 | 5.90E-09  | -0.106 | 0.039 | 6.09E-03  |
| rs140179699 | A | G |      | 0.0073  | 0.0011 | 0.95 | 1.20E-11  | 1.103  | 0.100 | 4.52E-28  |
| rs1570521   | T | G |      | 0.002   | 0.0004 | 0.41 | 8.50E-09  | 0.164  | 0.039 | 2.53E-05  |
| rs4441471   | A | G | TRUE | 0.0022  | 0.0004 | 0.72 | 1.10E-08  | 0.127  | 0.042 | 2.78E-03  |
| rs6555317   | A | G |      | 0.0024  | 0.0004 | 0.69 | 6.40E-09  | 0.248  | 0.041 | 1.93E-09  |
| rs7095954   | A | T |      | -0.0019 | 0.0003 | 0.47 | 2.80E-08  | -0.216 | 0.038 | 1.71E-08  |
| rs35662455  | C | G | TRUE | 0.003   | 0.0005 | 0.88 | 2.90E-08  | -0.020 | 0.060 | 7.36E-01  |
| rs6088734   | A | T | TRUE | 0.0029  | 0.0003 | 0.43 | 6.60E-17  | 0.002  | 0.039 | 9.49E-01  |
| rs11211257  | A | G |      | 0.0039  | 0.0006 | 0.9  | 2.10E-11  | 0.448  | 0.062 | 3.55E-13  |
| rs6135224   | A | G | TRUE | -0.002  | 0.0004 | 0.69 | 4.00E-08  | -0.080 | 0.042 | 5.29E-02  |
| rs1050816   | T | C | TRUE | 0.0029  | 0.0004 | 0.33 | 1.70E-15  | 0.083  | 0.041 | 4.23E-02  |
| rs11071738  | T | C |      | -0.0025 | 0.0003 | 0.53 | 5.50E-13  | -0.335 | 0.039 | 3.74E-18  |
| rs11794652  | A | G | TRUE | -0.0028 | 0.0005 | 0.16 | 9.30E-09  | -0.164 | 0.052 | 1.64E-03  |
| rs9894634   | T | C |      | -0.0021 | 0.0003 | 0.6  | 1.70E-09  | -0.164 | 0.039 | 2.80E-05  |
| rs2244237   | T | G |      | 0.0027  | 0.0004 | 0.22 | 8.40E-11  | 0.302  | 0.046 | 4.18E-11  |

|             |   |   |      |         |        |      |           |        |       |          |
|-------------|---|---|------|---------|--------|------|-----------|--------|-------|----------|
| rs62432759  | A | G |      | -0.0025 | 0.0004 | 0.78 | 7.60E-09  | -0.176 | 0.047 | 1.92E-04 |
| rs7535253   | T | C |      | 0.0023  | 0.0004 | 0.21 | 4.90E-08  | 0.191  | 0.047 | 4.84E-05 |
| rs1119066   | A | C |      | 0.0027  | 0.0005 | 0.15 | 2.00E-08  | 0.230  | 0.053 | 1.60E-05 |
| rs4567937   | A | G |      | -0.0032 | 0.0004 | 0.32 | 6.40E-18  | -0.425 | 0.041 | 6.54E-25 |
| rs111827672 | A | T |      | 0.0031  | 0.0004 | 0.32 | 1.00E-16  | 0.259  | 0.040 | 1.64E-10 |
| rs1153855   | C | G | TRUE | 0.0086  | 0.0004 | 0.62 | 1.20E-132 | 0.006  | 0.040 | 8.87E-01 |
| rs7203398   | A | C |      | 0.0027  | 0.0004 | 0.73 | 2.90E-12  | 0.381  | 0.043 | 5.85E-19 |
| rs78444298  | A | G |      | -0.0107 | 0.0014 | 0.02 | 2.50E-14  | -0.735 | 0.139 | 1.32E-07 |
| rs11071939  | T | C | TRUE | -0.0038 | 0.0007 | 0.92 | 4.50E-09  | -0.040 | 0.075 | 5.98E-01 |
| rs3850625   | A | G | TRUE | 0.0048  | 0.0006 | 0.12 | 3.60E-18  | 0.163  | 0.059 | 5.91E-03 |
| rs7565830   | A | G |      | -0.0022 | 0.0004 | 0.72 | 8.80E-09  | -0.210 | 0.043 | 1.08E-06 |
| rs13029395  | T | C |      | 0.0034  | 0.0006 | 0.18 | 1.50E-09  | 0.199  | 0.051 | 8.54E-05 |
| rs78936994  | T | G |      | 0.0024  | 0.0004 | 0.22 | 1.00E-08  | 0.179  | 0.047 | 1.37E-04 |
| rs55938024  | A | G |      | -0.0065 | 0.0006 | 0.12 | 1.40E-26  | -0.582 | 0.062 | 4.34E-21 |
| rs4566      | T | G | TRUE | 0.002   | 0.0004 | 0.61 | 1.00E-08  | 0.067  | 0.039 | 8.68E-02 |
| rs7326821   | A | G |      | 0.0026  | 0.0005 | 0.83 | 3.80E-08  | 0.436  | 0.050 | 5.56E-18 |
| rs10086569  | T | C |      | 0.0028  | 0.0004 | 0.24 | 5.70E-12  | 0.184  | 0.046 | 5.37E-05 |
| rs495237    | T | G |      | 0.0029  | 0.0004 | 0.25 | 5.50E-13  | 0.166  | 0.044 | 1.45E-04 |
| rs506000    | T | C |      | -0.0038 | 0.0006 | 0.91 | 4.20E-10  | -0.458 | 0.070 | 4.62E-11 |
| rs35472707  | T | C |      | -0.0075 | 0.0008 | 0.05 | 9.50E-20  | -0.461 | 0.090 | 2.96E-07 |
| rs11261022  | A | C | TRUE | -0.0027 | 0.0004 | 0.36 | 3.70E-14  | -0.128 | 0.040 | 1.43E-03 |
| rs1595810   | A | G |      | -0.0024 | 0.0004 | 0.2  | 4.40E-08  | -0.255 | 0.048 | 1.31E-07 |
| rs1858800   | T | C |      | 0.0022  | 0.0004 | 0.35 | 3.70E-09  | 0.156  | 0.041 | 1.18E-04 |
| rs34468415  | A | G | TRUE | -0.0028 | 0.0004 | 0.64 | 2.80E-15  | -0.109 | 0.040 | 6.02E-03 |
| rs3822939   | A | G | TRUE | -0.0028 | 0.0003 | 0.46 | 3.10E-16  | 0.046  | 0.038 | 2.36E-01 |
| rs6458868   | T | C |      | -0.0021 | 0.0004 | 0.65 | 3.50E-09  | -0.278 | 0.040 | 4.10E-12 |
| rs12736457  | C | G | TRUE | 0.0056  | 0.0005 | 0.87 | 8.80E-27  | 0.064  | 0.057 | 2.68E-01 |
| rs3793805   | A | G | TRUE | -0.002  | 0.0004 | 0.57 | 1.00E-08  | -0.123 | 0.039 | 1.50E-03 |
| rs35629566  | C | G | TRUE | 0.003   | 0.0005 | 0.83 | 5.70E-10  | -0.140 | 0.050 | 5.49E-03 |
| rs2074204   | T | C | TRUE | -0.0025 | 0.0004 | 0.26 | 2.20E-10  | -0.056 | 0.044 | 2.04E-01 |
| rs4886425   | A | G | TRUE | -0.0027 | 0.0005 | 0.17 | 4.30E-09  | -0.099 | 0.051 | 5.30E-02 |
| rs509345    | A | G |      | 0.0024  | 0.0003 | 0.52 | 1.30E-12  | 0.285  | 0.038 | 1.11E-13 |
| rs417237    | T | G | TRUE | 0.002   | 0.0004 | 0.61 | 1.10E-08  | 0.019  | 0.040 | 6.35E-01 |
| rs11062167  | A | G | TRUE | -0.0042 | 0.0003 | 0.53 | 7.10E-34  | -0.099 | 0.039 | 1.01E-02 |
| rs13157326  | A | G |      | -0.0027 | 0.0004 | 0.48 | 2.90E-12  | -0.220 | 0.039 | 1.62E-08 |
| rs6088528   | A | G | TRUE | -0.0033 | 0.0003 | 0.5  | 9.60E-22  | -0.091 | 0.038 | 1.76E-02 |
| rs544169    | A | G | TRUE | 0.0024  | 0.0004 | 0.74 | 1.00E-09  | -0.041 | 0.043 | 3.41E-01 |
| rs35072105  | A | G | TRUE | -0.0021 | 0.0004 | 0.55 | 2.00E-09  | -0.102 | 0.038 | 7.84E-03 |
| rs1397764   | A | G |      | 0.0047  | 0.0004 | 0.28 | 7.80E-34  | 0.270  | 0.043 | 4.52E-10 |
| rs396341    | T | C | TRUE | 0.003   | 0.0004 | 0.26 | 1.70E-14  | 0.161  | 0.044 | 2.37E-04 |
| rs9887775   | A | G | TRUE | -0.0035 | 0.0004 | 0.81 | 5.20E-15  | -0.158 | 0.050 | 1.51E-03 |
| rs11237450  | A | C | TRUE | 0.003   | 0.0005 | 0.17 | 2.10E-09  | -0.137 | 0.052 | 8.78E-03 |
| rs10994860  | T | C |      | 0.0039  | 0.0004 | 0.19 | 2.70E-18  | 0.396  | 0.050 | 4.14E-15 |
| rs72995641  | A | G |      | -0.0026 | 0.0004 | 0.2  | 1.40E-09  | -0.208 | 0.048 | 1.26E-05 |
| rs2156664   | T | C | TRUE | -0.0021 | 0.0004 | 0.27 | 3.80E-08  | -0.149 | 0.043 | 5.71E-04 |
| rs267738    | T | G |      | -0.005  | 0.0004 | 0.79 | 1.30E-32  | -0.523 | 0.046 | 1.20E-29 |
| rs3797537   | A | G | TRUE | 0.0021  | 0.0004 | 0.71 | 1.90E-08  | 0.140  | 0.043 | 1.00E-03 |
| rs7667050   | T | C | TRUE | 0.002   | 0.0003 | 0.47 | 3.00E-09  | 0.108  | 0.038 | 4.90E-03 |
| rs11166440  | A | G |      | 0.0021  | 0.0004 | 0.63 | 1.10E-08  | 0.270  | 0.040 | 1.30E-11 |
| rs2442604   | T | C | TRUE | -0.002  | 0.0003 | 0.55 | 9.20E-09  | -0.055 | 0.039 | 1.52E-01 |
| rs72834794  | A | C | TRUE | -0.0041 | 0.0006 | 0.91 | 2.00E-10  | -0.181 | 0.070 | 1.03E-02 |
| rs62491533  | T | C |      | -0.0027 | 0.0005 | 0.83 | 2.10E-09  | -0.201 | 0.051 | 8.41E-05 |
| rs61993680  | A | C | TRUE | -0.0022 | 0.0004 | 0.65 | 1.50E-08  | -0.122 | 0.040 | 2.36E-03 |
| rs10851543  | A | G |      | 0.003   | 0.0003 | 0.56 | 1.30E-18  | 0.413  | 0.039 | 1.18E-26 |
| rs2301343   | T | G | TRUE | -0.0023 | 0.0004 | 0.74 | 9.10E-09  | -0.105 | 0.045 | 1.97E-02 |
| rs4836732   | T | C |      | 0.0025  | 0.0003 | 0.53 | 4.70E-13  | 0.215  | 0.039 | 2.54E-08 |
| rs1719934   | A | G | TRUE | 0.0028  | 0.0003 | 0.54 | 3.70E-16  | 0.114  | 0.039 | 3.06E-03 |

|             |   |   |      |         |        |      |          |        |       |          |
|-------------|---|---|------|---------|--------|------|----------|--------|-------|----------|
| rs2252281   | T | C | TRUE | 0.0041  | 0.0004 | 0.61 | 8.50E-30 | 0.096  | 0.039 | 1.52E-02 |
| rs12024377  | A | G |      | 0.002   | 0.0004 | 0.37 | 4.20E-08 | 0.192  | 0.040 | 1.59E-06 |
| rs113956264 | T | C | TRUE | 0.0081  | 0.0012 | 0.04 | 1.70E-11 | 0.005  | 0.112 | 9.64E-01 |
| rs117113238 | A | G |      | 0.0039  | 0.0006 | 0.09 | 1.10E-10 | 0.555  | 0.068 | 5.57E-16 |
| rs11191686  | A | G | TRUE | 0.002   | 0.0004 | 0.36 | 3.70E-08 | 0.065  | 0.040 | 1.04E-01 |
| rs1509117   | A | T | TRUE | 0.0025  | 0.0004 | 0.3  | 3.30E-10 | 0.067  | 0.043 | 1.20E-01 |
| rs1883991   | A | C | TRUE | -0.0032 | 0.0004 | 0.69 | 2.30E-17 | -0.132 | 0.041 | 1.23E-03 |
| rs3795503   | T | C |      | 0.0022  | 0.0004 | 0.33 | 1.50E-08 | 0.223  | 0.041 | 6.43E-08 |
| rs10272546  | A | G | TRUE | -0.002  | 0.0003 | 0.54 | 7.90E-09 | -0.092 | 0.038 | 1.66E-02 |
| rs77915916  | A | T | TRUE | 0.0047  | 0.0006 | 0.92 | 3.50E-14 | -0.109 | 0.069 | 1.14E-01 |
| rs1548945   | T | C | TRUE | 0.0037  | 0.0004 | 0.41 | 1.30E-24 | 0.095  | 0.039 | 1.53E-02 |
| rs10846157  | A | C |      | -0.0036 | 0.0004 | 0.81 | 1.30E-16 | -0.480 | 0.048 | 1.06E-23 |
| rs113445505 | T | C |      | 0.0038  | 0.0004 | 0.37 | 2.00E-26 | 0.342  | 0.039 | 3.40E-18 |
| rs10432479  | T | C | TRUE | -0.0021 | 0.0004 | 0.37 | 4.20E-09 | -0.093 | 0.040 | 1.94E-02 |
| rs807624    | T | G |      | 0.0034  | 0.0004 | 0.34 | 1.50E-20 | 0.549  | 0.040 | 6.18E-43 |
| rs233438    | A | G |      | 0.0043  | 0.0004 | 0.81 | 2.80E-22 | 0.227  | 0.050 | 4.79E-06 |
| rs13200335  | A | C |      | 0.0024  | 0.0003 | 0.42 | 1.50E-11 | 0.196  | 0.039 | 5.11E-07 |
| rs62187541  | A | G |      | -0.0037 | 0.0007 | 0.93 | 4.10E-08 | -0.323 | 0.078 | 3.12E-05 |
| rs62053077  | T | G | TRUE | -0.0025 | 0.0004 | 0.37 | 3.90E-10 | 0.112  | 0.040 | 4.66E-03 |
| rs4871905   | C | G |      | -0.0043 | 0.0003 | 0.42 | 1.80E-35 | -0.708 | 0.039 | 7.91E-74 |
| rs6833292   | T | C | TRUE | 0.002   | 0.0003 | 0.44 | 1.10E-08 | 0.093  | 0.039 | 1.60E-02 |
| rs8101667   | T | C |      | 0.005   | 0.0004 | 0.33 | 2.20E-43 | 0.509  | 0.041 | 4.14E-36 |
| rs2039424   | A | G |      | 0.0048  | 0.0004 | 0.62 | 9.70E-41 | 0.400  | 0.040 | 5.47E-24 |
| rs78986840  | T | C | TRUE | -0.0045 | 0.0007 | 0.94 | 1.40E-09 | -0.064 | 0.081 | 4.30E-01 |
| rs3018667   | A | G |      | -0.0024 | 0.0004 | 0.32 | 1.20E-10 | -0.178 | 0.041 | 1.08E-05 |
| rs2834317   | A | G |      | -0.0031 | 0.0005 | 0.15 | 2.80E-10 | -0.540 | 0.054 | 6.02E-24 |
| rs73116829  | A | G |      | -0.0043 | 0.0006 | 0.11 | 1.60E-13 | -0.490 | 0.067 | 3.16E-13 |
| rs6481598   | C | G |      | 0.0023  | 0.0004 | 0.78 | 3.80E-08 | 0.269  | 0.047 | 1.12E-08 |
| rs7687209   | T | C | TRUE | 0.0022  | 0.0004 | 0.42 | 1.50E-09 | 0.085  | 0.039 | 2.79E-02 |
| rs6780429   | A | C | TRUE | -0.002  | 0.0003 | 0.53 | 6.70E-09 | 0.052  | 0.039 | 1.74E-01 |
| rs1994887   | A | C |      | -0.0024 | 0.0004 | 0.28 | 2.30E-09 | -0.201 | 0.044 | 4.09E-06 |
| rs1569011   | A | G | TRUE | 0.002   | 0.0003 | 0.44 | 1.70E-08 | 0.044  | 0.039 | 2.58E-01 |
| rs57126710  | T | C | TRUE | 0.0025  | 0.0004 | 0.35 | 6.20E-12 | 0.148  | 0.040 | 2.10E-04 |
| rs28581385  | A | T |      | -0.0033 | 0.0005 | 0.85 | 1.60E-11 | -0.397 | 0.055 | 3.88E-13 |
| rs2236521   | A | G |      | -0.0022 | 0.0004 | 0.55 | 4.80E-10 | -0.156 | 0.039 | 5.40E-05 |
| rs28404308  | A | T |      | 0.0027  | 0.0005 | 0.62 | 2.00E-09 | NA     | NA    | NA       |

eGFR = estimated glomerular filtration rate, se = standard error, pval = P value, OR = odds ratio



Supplemental Table 2. Genetic instruments for log-transformed eGFR based on cystatin C levels.

| Basic information |               |              | Variant filter                                                      | Exposure                          |           |          |          |             | log-transformed eGFR (creatinine) |         |          |           |             | Blood urea nitrogen |           |          |          |             |
|-------------------|---------------|--------------|---------------------------------------------------------------------|-----------------------------------|-----------|----------|----------|-------------|-----------------------------------|---------|----------|-----------|-------------|---------------------|-----------|----------|----------|-------------|
| RSID              | effect allele | other allele | Irrelevant, weak association with alternate kidney function marker) | log-transformed eGFR (cystatin C) |           |          |          |             | log-transformed eGFR (creatinine) |         |          |           |             | Blood urea nitrogen |           |          |          |             |
|                   |               |              |                                                                     | eaf                               | beta      | se       | pval     | sample size | eaf                               | beta    | se       | pval      | sample size | eaf                 | beta      | se       | pval     | sample size |
| rs10015716        | G             | A            |                                                                     | 0.6448                            | -0.0015   | 5.00E-04 | 0.00127  | 460826      | 0.3578                            | -0.0015 | 3.00E-04 | 7.01E-09  | 1158670     | 0.6429              | 7.00E-04  | 5.00E-04 | 0.19     | 809561      |
| rs10035662        | C             | A            |                                                                     | 0.6713                            | -0.0012   | 5.00E-04 | 0.01474  | 460826      | 0.3196                            | -0.0015 | 3.00E-04 | 3.05E-09  | 1145780     | 0.6834              | 7.00E-04  | 5.00E-04 | 0.196    | 835094      |
| rs10040082        | C             | T            |                                                                     | 0.378                             | -0.0013   | 5.00E-04 | 0.004849 | 460826      | 0.6104                            | -0.0018 | 3.00E-04 | 8.87E-12  | 1102830     | 0.3993              | 0.0026    | 5.00E-04 | 1.37E-07 | 805066      |
| rs1004441         | G             | A            |                                                                     | 0.7478                            | -0.0019   | 5.00E-04 | 0.000438 | 460826      | 0.2509                            | -0.0018 | 3.00E-04 | 3.07E-11  | 1201730     | 0.7528              | -4.00E-04 | 6.00E-04 | 0.4943   | 852479      |
| rs10111035        | G             | A            | TRUE                                                                | 0.5855                            | -8.00E-04 | 5.00E-04 | 0.08943  | 460826      | 0.4263                            | -0.0015 | 3.00E-04 | 1.33E-08  | 1196300     | 0.5608              | -7.00E-04 | 5.00E-04 | 0.1444   | 851729      |
| rs10142358        | G             | A            |                                                                     | 0.5079                            | -0.002    | 5.00E-04 | 1.52E-05 | 460826      | 0.5083                            | -0.0021 | 3.00E-04 | 1.85E-16  | 1201880     | 0.4905              | 1.00E-04  | 5.00E-04 | 0.8277   | 852635      |
| rs10151563        | G             | A            |                                                                     | 0.6137                            | -0.0022   | 5.00E-04 | 2.02E-06 | 460826      | 0.6208                            | -0.0018 | 3.00E-04 | 1.09E-12  | 1201700     | 0.624               | 0.0014    | 5.00E-04 | 0.005893 | 852452      |
| rs10182296        | G             | A            | TRUE                                                                | 0.6288                            | -7.00E-04 | 5.00E-04 | 0.1192   | 460826      | 0.3599                            | -0.002  | 3.00E-04 | 9.22E-15  | 1201830     | 0.6414              | 1.00E-04  | 5.00E-04 | 0.9092   | 852581      |
| rs10206895        | T             | C            |                                                                     | 0.7777                            | -0.0051   | 6.00E-04 | 2.62E-20 | 460826      | 0.7745                            | -0.0063 | 3.00E-04 | 3.32E-84  | 1040520     | 0.7727              | 0.0034    | 6.00E-04 | 7.00E-08 | 704884      |
| rs10224210        | C             | T            |                                                                     | 0.7224                            | -0.0092   | 5.00E-04 | 2.04E-72 | 460826      | 0.2773                            | -0.0078 | 3.00E-04 | 1.57E-139 | 978562      | 0.7202              | 0.0127    | 6.00E-04 | 9.13E-97 | 648247      |
| rs10241875        | T             | A            |                                                                     | 0.6053                            | -0.0026   | 5.00E-04 | 3.75E-08 | 460826      | 0.3829                            | -0.0017 | 3.00E-04 | 2.61E-11  | 1201780     | 0.6218              | 0.0015    | 5.00E-04 | 0.002283 | 852532      |
| rs10283362        | C             | T            |                                                                     | 0.1588                            | -0.0027   | 6.00E-04 | 1.85E-05 | 460826      | 0.8416                            | -0.0021 | 3.00E-04 | 4.94E-10  | 1159120     | 0.1576              | 0.0025    | 7.00E-04 | 0.000327 | 810011      |
| rs1041606         | T             | C            |                                                                     | 0.2473                            | -0.0013   | 5.00E-04 | 0.01787  | 460826      | 0.2407                            | -0.0018 | 3.00E-04 | 8.70E-09  | 1198730     | 0.2394              | 0.002     | 6.00E-04 | 0.000807 | 850688      |
| rs10419627        | A             | G            | TRUE                                                                | 0.5874                            | 4.00E-04  | 5.00E-04 | 0.399    | 459184      | 0.6049                            | -0.0017 | 3.00E-04 | 3.20E-11  | 1195450     | 0.6047              | 0         | 5.00E-04 | 0.9485   | 852387      |
| rs1042752         | G             | A            |                                                                     | 0.5428                            | -0.0032   | 5.00E-04 | 6.09E-12 | 460826      | 0.4399                            | -0.0018 | 3.00E-04 | 4.49E-12  | 1200940     | 0.5667              | -0.0019   | 5.00E-04 | 8.76E-05 | 851687      |
| rs10439970        | G             | T            |                                                                     | 0.684                             | -0.0035   | 5.00E-04 | 7.24E-13 | 460826      | 0.3178                            | -0.003  | 3.00E-04 | 2.42E-29  | 1198020     | 0.6829              | 0.0023    | 5.00E-04 | 6.94E-06 | 852671      |
| rs10445262        | A             | G            |                                                                     | 0.7564                            | -0.0012   | 5.00E-04 | 0.02527  | 460826      | 0.6975                            | -0.0015 | 3.00E-04 | 1.89E-08  | 1196300     | 0.7                 | 0.0012    | 6.00E-04 | 0.0276   | 851729      |
| rs10447437        | A             | G            |                                                                     | 0.5477                            | -0.0014   | 5.00E-04 | 0.003152 | 460826      | 0.5325                            | -0.0015 | 3.00E-04 | 1.68E-09  | 1148220     | 0.5319              | 0.0011    | 5.00E-04 | 0.02803  | 800550      |
| rs1047891         | A             | C            | TRUE                                                                | 0.3137                            | 0.0039    | 5.00E-04 | 3.40E-15 | 460826      | 0.3044                            | -0.007  | 3.00E-04 | 4.91E-116 | 1158670     | 0.302               | -0.0071   | 5.00E-04 | 2.77E-40 | 809561      |
| rs1050816         | C             | T            |                                                                     | 0.3308                            | -0.001    | 5.00E-04 | 0.0365   | 460826      | 0.6703                            | -0.0031 | 3.00E-04 | 7.74E-32  | 1195800     | 0.334               | 9.00E-04  | 5.00E-04 | 0.8055   | 851228      |
| rs10746942        | G             | A            |                                                                     | 0.6236                            | -0.0042   | 5.00E-04 | 1.04E-18 | 460826      | 0.3679                            | -0.0047 | 3.00E-04 | 1.64E-72  | 1187900     | 0.634               | 0.0034    | 5.00E-04 | 1.04E-11 | 838648      |
| rs1075472         | G             | A            |                                                                     | 0.814                             | 0.001     | 6.00E-04 | 0.09149  | 460826      | 0.1847                            | -0.0027 | 3.00E-04 | 6.63E-16  | 1035330     | 0.8133              | 0.0025    | 7.00E-04 | 0.000263 | 703536      |
| rs10769264        | T             | C            |                                                                     | 0.385                             | -0.0026   | 5.00E-04 | 4.50E-08 | 460826      | 0.3726                            | -0.0023 | 3.00E-04 | 1.05E-19  | 1201300     | 0.3722              | 0.0035    | 5.00E-04 | 1.15E-12 | 852537      |
| rs10790454        | C             | A            |                                                                     | 0.7322                            | -0.0021   | 5.00E-04 | 6.97E-05 | 460826      | 0.2608                            | -0.0021 | 3.00E-04 | 5.00E-15  | 1201870     | 0.7347              | 0.0034    | 6.00E-04 | 1.55E-09 | 852623      |
| rs10797427        | C             | T            |                                                                     | 0.5946                            | -0.0021   | 5.00E-04 | 7.80E-06 | 460826      | 0.3956                            | -0.0017 | 3.00E-04 | 2.57E-11  | 1150150     | 0.6028              | 8.00E-04  | 5.00E-04 | 0.08547  | 804814      |
| rs10821905        | G             | T            |                                                                     | 0.1794                            | -0.0041   | 6.00E-04 | 1.25E-11 | 460826      | 0.8201                            | -0.0043 | 3.00E-04 | 3.85E-37  | 1196300     | 0.1761              | 0.0025    | 7.00E-04 | 0.000185 | 851729      |
| rs10821944        | G             | A            |                                                                     | 0.7265                            | -0.0014   | 5.00E-04 | 0.005799 | 460825      | 0.2882                            | -0.002  | 3.00E-04 | 1.95E-13  | 1199640     | 0.7109              | 0.0032    | 5.00E-04 | 9.12E-10 | 851605      |
| rs10824852        | A             | A            |                                                                     | 0.4484                            | -0.0013   | 5.00E-04 | 0.005844 | 454011      | 0.5525                            | -0.0018 | 3.00E-04 | 1.76E-09  | 837675      | 0.45                | 3.00E-04  | 6.00E-04 | 0.6033   | 586451      |
| rs1082710         | T             | G            |                                                                     | 0.3513                            | -0.0015   | 5.00E-04 | 0.002046 | 460826      | 0.3931                            | -0.0016 | 3.00E-04 | 2.21E-09  | 1201830     | 0.3949              | -4.00E-04 | 5.00E-04 | 0.4286   | 852584      |
| rs1082742         | T             | C            |                                                                     | 0.4639                            | -9.00E-04 | 5.00E-04 | 0.04414  | 460826      | 0.4439                            | -0.0018 | 3.00E-04 | 6.16E-12  | 1159620     | 0.4401              | 0.0013    | 5.00E-04 | 0.01106  | 810512      |
| rs10850007        | A             | T            |                                                                     | 0.4315                            | -0.0088   | 5.00E-04 | 5.68E-78 | 460826      | 0.4535                            | -0.0017 | 3.00E-04 | 1.11E-10  | 1155920     | 0.4571              | 0.0016    | 5.00E-04 | 0.001572 | 808752      |
| rs10851882        | G             | A            |                                                                     | 0.7488                            | -0.0065   | 5.00E-04 | 2.21E-34 | 460826      | 0.2485                            | -0.0056 | 3.00E-04 | 4.00E-69  | 1030720     | 0.7489              | 0.0092    | 6.00E-04 | 4.06E-51 | 709689      |
| rs10857147        | A             | T            |                                                                     | 0.7112                            | -0.0029   | 5.00E-04 | 9.44E-09 | 460826      | 0.7039                            | -0.0033 | 3.00E-04 | 3.64E-36  | 1159620     | 0.7098              | 0.0029    | 5.00E-04 | 7.00E-08 | 810512      |
| rs10866705        | C             | A            |                                                                     | 0.7551                            | -0.0079   | 5.00E-04 | 7.93E-49 | 460825      | 0.2606                            | -0.0063 | 3.00E-04 | 2.24E-120 | 1186370     | 0.7443              | 0.0053    | 6.00E-04 | 2.99E-21 | 843172      |
| rs1087289         | G             | T            |                                                                     | 0.6034                            | -0.0028   | 5.00E-04 | 4.68E-09 | 460826      | 0.4121                            | -0.0018 | 3.00E-04 | 2.90E-12  | 1062490     | 0.5886              | 0.0023    | 5.00E-04 | 1.44E-05 | 788278      |
| rs1087830         | A             | T            | TRUE                                                                | 0.7075                            | -9.00E-04 | 5.00E-04 | 0.07087  | 460826      | 0.6879                            | -0.0016 | 3.00E-04 | 4.59E-09  | 1201720     | 0.6751              | -3.00E-04 | 5.00E-04 | 0.6075   | 852478      |
| rs10892358        | G             | A            |                                                                     | 0.5547                            | -0.0012   | 5.00E-04 | 0.008208 | 460825      | 0.426                             | -0.0016 | 3.00E-04 | 2.13E-10  | 1148900     | 0.5741              | 4.00E-04  | 5.00E-04 | 0.4153   | 801003      |
| rs10934753        | A             | G            | TRUE                                                                | 0.4139                            | 1.00E-04  | 5.00E-04 | 0.8215   | 460826      | 0.4081                            | -0.002  | 3.00E-04 | 4.92E-15  | 1201920     | 0.4021              | 3.00E-04  | 5.00E-04 | 0.6009   | 852675      |
| rs11057413        | A             | G            |                                                                     | 0.6674                            | -0.0015   | 5.00E-04 | 0.002001 | 460826      | 0.6759                            | -0.0018 | 3.00E-04 | 1.93E-09  | 909512      | 0.6797              | -4.00E-04 | 6.00E-04 | 0.443    | 755581      |
| rs11062102        | C             | T            |                                                                     | 0.3477                            | -5.00E-04 | 5.00E-04 | 0.2865   | 460826      | 0.6202                            | -0.004  | 3.00E-04 | 9.39E-53  | 1201680     | 0.388               | 0.0019    | 5.00E-04 | 0.000198 | 852430      |
| rs11063202        | G             | A            |                                                                     | 0.8799                            | -0.0015   | 7.00E-04 | 0.02903  | 460826      | 0.1214                            | -0.0026 | 4.00E-04 | 3.19E-10  | 1200960     | 0.8781              | 0.0014    | 8.00E-04 | 0.07854  | 852296      |
| rs11071738        | T             | C            |                                                                     | 0.5324                            | -0.0038   | 5.00E-04 | 3.04E-16 | 460826      | 0.5497                            | -0.0025 | 3.00E-04 | 1.59E-23  | 1201590     | 0.5563              | 0.0022    | 5.00E-04 | 4.67E-06 | 852344      |
| rs11108066        | A             | G            | TRUE                                                                | 0.5577                            | -7.00E-04 | 5.00E-04 | 0.1436   | 460826      | 0.553                             | -0.0014 | 3.00E-04 | 3.63E-08  | 1159120     | 0.558               | 2.00E-04  | 5.00E-04 | 0.6321   | 810011      |
| rs11109717        | T             | C            |                                                                     | 0.6977                            | -0.0025   | 5.00E-04 | 5.03E-07 | 460826      | 0.706                             | -0.0017 | 3.00E-04 | 2.71E-08  | 1199130     | 0.7124              | 0.002     | 5.00E-04 | 0.000246 | 852461      |
| rs1111571         | G             | A            | TRUE                                                                | 0.7194                            | -6.00E-04 | 5.00E-04 | 0.2403   | 460826      | 0.2762                            | -0.0026 | 3.00E-04 | 6.71E-22  | 1198390     | 0.7288              | -6.00E-04 | 5.00E-04 | 0.2553   | 850363      |
| rs11123165        | C             | T            |                                                                     | 0.6683                            | -0.0029   | 5.00E-04 | 3.73E-09 | 460826      | 0.3253                            | -0.0025 | 3.00E-04 | 2.73E-21  | 1195190     | 0.6775              | 0.0063    | 5.00E-04 | 2.09E-35 | 850634      |
| rs11160318        | A             | G            |                                                                     | 0.3188                            | -0.0022   | 5.00E-04 | 5.33E-06 | 460826      | 0.3649                            | -0.0017 | 3.00E-04 | 2.39E-10  | 1152940     | 0.3639              | 0.0014    | 5.00E-04 | 0.00878  | 809561      |
| rs11170624        | G             | T            |                                                                     | 0.172                             | -0.0017   | 6.00E-04 | 0.005417 | 460826      | 0.8149                            | -0.0024 | 3.00E-04 | 2.32E-12  | 1154640     | 0.1901              | 8.00E-04  | 6.00E-04 | 0.2091   | 849346      |
| rs11176074        | A             | G            | TRUE                                                                | 0.1331                            | -2.00E-04 | 7.00E-04 | 0.7196   | 451330      | 0.1322                            | -0.0023 | 4.00E-04 | 5.35E-09  | 1088820     | 0.1304              | 1.00E-04  | 8.00E-04 | 0.8781   | 765490      |
| rs11202328        | C             | T            | TRUE                                                                | 0.1355                            | -8.00E-04 | 7.00E-04 | 0.2352   | 460826      | 0.786                             | -0.0022 | 4.00E-04 | 5.89E-10  | 1201580     | 0.2212              | -1.00E-04 | 7.00E-04 | 0.9177   | 852333      |
| rs11217554        | T             | C            | TRUE                                                                | 0.6294                            | 4.00E-04  | 5.00E-04 | 0.3819   | 460826      | 0.6386                            | -0.0019 | 3.00E-04 | 7.32E-14  | 1201910     | 0.6409              | 2.00E-04  | 5.00E-04 | 0.705    | 852558      |
| rs11237452        | A             | C            |                                                                     | 0.1653                            | 0.0013    | 6.00E-04 | 0.04028  | 460826      | 0.789                             | -0.0026 | 3.00E-04 | 1.18E-14  | 1062090     | 0.2274              | 0.0017    | 6.00E-04 | 0.008425 | 768386      |
| rs11243145        | A             | G            |                                                                     | 0.6179                            | -0.0041   | 5.00E-04 | 1.57E-17 | 460826      | 0.6261                            | -0.003  | 3.00E-04 | 1.28E-23  | 1004250     | 0.6241              | 0.0031    | 5.00E-04 | 1.10E-08 | 668751      |
| rs11290505        | T             | C            |                                                                     | 0.0155                            | -0.0104   | 0.0019   | 4.76E-08 | 460826      | 0.0168                            | -0.0087 | 0.0012   | 2.85E-13  | 938492      | 0.0159              | 0.0116    | 0.0022   | 2.25E-07 | 644673      |
| rs11344103        | T             | C            |                                                                     | 0.1669                            | -0.006    | 6.00E-04 | 1.48E-22 | 460826      | 0.1644                            | -0.0031 | 3.00E-04 | 9.73E-20  | 1201690     | 0.1655              | 0.0031    | 6.00E-04 | 1.34E-06 | 852445      |
| rs11557045        | T             | C            |                                                                     | 0.0655                            | -0.005    | 9.00E-04 | 9.30E-08 | 451330      | 0.0645                            | -0.0044 | 6.00E-04 | 8.97E-14  | 9218650     | 0.0656              | 0.0067    | 0.0011   | 1.24E-09 | 660968      |
| rs11581477        | A             | G            |                                                                     | 0.0121                            | -0.0078   | 0.0021   | 0.000205 | 458306      | 0.0131                            | -0.0083 | 0.0013   | 4.22E-11  | 1014900     | 0.0122              | 0.0031    | 0.0024   | 0.206    | 686211      |
| rs11613538        | T             | G</          |                                                                     |                                   |           |          |          |             |                                   |         |          |           |             |                     |           |          |          |             |

|           |   |   |      |        |           |            |          |        |        |         |          |          |         |        |           |          |          |        |
|-----------|---|---|------|--------|-----------|------------|----------|--------|--------|---------|----------|----------|---------|--------|-----------|----------|----------|--------|
| rs1260326 | C | T |      | 0.3949 | -0.004    | 5.00E-04   | 2.81E-17 | 460824 | 0.5909 | -0.005  | 3.00E-04 | 3.12E-84 | 1150400 | 0.4185 | -0.0053   | 5.00E-04 | 1.01E-26 | 807178 |
| rs1261495 | T | C |      | 0.5139 | -0.0022   | 5.00E-04   | 1.43E-06 | 460826 | 0.4957 | -0.0026 | 3.00E-04 | 4.79E-24 | 1159620 | 0.4919 | 4.00E-04  | 5.00E-04 | 0.4785   | 810512 |
| rs1271326 | C | T |      | 0.6476 | -0.0031   | 5.00E-04   | 9.84E-11 | 460826 | 0.3402 | -0.0024 | 3.00E-04 | 8.03E-20 | 1159620 | 0.6552 | -8.00E-04 | 5.00E-04 | 0.1465   | 810512 |
| rs1272710 | G | A |      | 0.5472 | -0.0012   | 5.00E-04   | 0.00997  | 460826 | 0.4717 | -0.0014 | 3.00E-04 | 2.07E-08 | 1200980 | 0.5252 | 2.00E-04  | 5.00E-04 | 0.6702   | 851729 |
| rs1273645 | G | C | TRUE | 0.8736 | -1.00E-04 | 7.00E-04   | 0.917    | 460826 | 0.1295 | -0.0057 | 4.00E-04 | 4.86E-45 | 1031540 | 0.8707 | 9.00E-04  | 8.00E-04 | 0.2334   | 699283 |
| rs1275609 | G | A |      | 0.3269 | -0.0015   | 5.00E-04   | 0.002603 | 460826 | 0.6385 | -0.002  | 3.00E-04 | 1.18E-14 | 1158670 | 0.3634 | 0.0036    | 5.00E-04 | 3.24E-11 | 809561 |
| rs1282608 | A | T |      | 0.7938 | -0.0055   | 5.00E-04   | 5.68E-22 | 460826 | 0.7781 | -0.0038 | 3.00E-04 | 4.54E-31 | 1201640 | 0.7665 | 0.0044    | 6.00E-04 | 1.04E-13 | 852385 |
| rs1289435 | T | C |      | 0.3526 | -0.001    | 5.00E-04   | 0.0338   | 460826 | 0.3468 | -0.0017 | 3.00E-04 | 2.98E-11 | 1150630 | 0.3425 | 0.0018    | 5.00E-04 | 0.000473 | 810512 |
| rs1290751 | G | C |      | 0.241  | -0.0023   | 5.00E-04   | 2.91E-05 | 460826 | 0.7128 | -0.0018 | 3.00E-04 | 1.35E-10 | 1159620 | 0.2871 | 0.0013    | 6.00E-04 | 0.02418  | 810512 |
| rs1294861 | G | T |      | 0.7954 | -0.0013   | 6.00E-04   | 0.02458  | 460826 | 0.2549 | -0.0018 | 3.00E-04 | 4.14E-08 | 1201870 | 0.7239 | 0.0013    | 6.00E-04 | 0.02725  | 852625 |
| rs1295054 | G | A |      | 0.6511 | -0.0013   | 5.00E-04   | 0.00534  | 460826 | 0.3664 | -0.0016 | 3.00E-04 | 1.39E-09 | 1201920 | 0.6335 | 0.0014    | 5.00E-04 | 0.004074 | 852675 |
| rs1303278 | G | C |      | 0.7004 | -0.0029   | 5.00E-04   | 1.28E-08 | 460826 | 0.3229 | -0.003  | 3.00E-04 | 1.37E-29 | 1159620 | 0.6814 | 0.0026    | 5.00E-04 | 2.59E-06 | 810512 |
| rs1305925 | T | C |      | 0.0291 | -0.0046   | 0.0014     | 0.00069  | 459015 | 0.0294 | -0.0053 | 8.00E-04 | 1.66E-10 | 974441  | 0.0298 | 0.01      | 0.0016   | 4.86E-10 | 644062 |
| rs1306493 | C | T | TRUE | 0.3956 | 0         | 5.00E-04   | 0.9568   | 460826 | 0.5875 | -0.0031 | 3.00E-04 | 1.22E-32 | 1201830 | 0.4157 | 6.00E-04  | 5.00E-04 | 0.212    | 852577 |
| rs1310821 | G | A | TRUE | 0.387  | -1.00E-04 | 5.00E-04   | 0.8173   | 457835 | 0.5955 | -0.0018 | 3.00E-04 | 5.08E-12 | 1155350 | 0.4128 | -3.00E-04 | 5.00E-04 | 0.6032   | 810011 |
| rs1314098 | G | A |      | 0.287  | -5.00E-04 | 5.00E-04   | 0.3596   | 460826 | 0.6607 | -0.0016 | 3.00E-04 | 4.04E-09 | 1158670 | 0.3435 | 0.0025    | 6.00E-04 | 7.02E-06 | 809561 |
| rs1315732 | A | G |      | 0.4624 | -0.0021   | 5.00E-04   | 5.66E-06 | 460826 | 0.4573 | -0.0024 | 3.00E-04 | 1.55E-21 | 1162800 | 0.451  | 0.0046    | 5.00E-04 | 3.61E-21 | 851618 |
| rs1315952 | A | G |      | 0.513  | -0.0024   | 5.00E-04   | 2.68E-07 | 459184 | 0.5028 | -0.0025 | 3.00E-04 | 1.11E-22 | 1105130 | 0.5048 | 8.00E-04  | 5.00E-04 | 0.1132   | 791847 |
| rs1316739 | A | G |      | 0.2337 | -0.0021   | 5.00E-04   | 0.000155 | 460826 | 0.2738 | -0.0016 | 3.00E-04 | 4.01E-09 | 1159620 | 0.2773 | 0.0023    | 6.00E-04 | 6.73E-05 | 810512 |
| rs1321917 | C | G |      | 0.4094 | -0.0021   | 5.00E-04   | 6.18E-06 | 460826 | 0.4259 | -0.0023 | 3.00E-04 | 4.95E-19 | 1201890 | 0.4301 | 0.0015    | 5.00E-04 | 0.002284 | 852639 |
| rs1324505 | A | G |      | 0.4546 | -0.0016   | 5.00E-04   | 0.000372 | 460826 | 0.4518 | -0.0019 | 3.00E-04 | 2.27E-13 | 1030500 | 0.4503 | 9.00E-04  | 5.00E-04 | 0.07881  | 689782 |
| rs132639  | A | T |      | 0.18   | -0.0017   | 6.00E-04   | 0.003774 | 460826 | 0.18   | -0.0025 | 3.00E-04 | 8.83E-14 | 1193290 | 0.1832 | 0.0019    | 7.00E-04 | 0.006033 | 852069 |
| rs1407040 | C | T |      | 0.6569 | -0.0033   | 5.00E-04   | 9.80E-12 | 460826 | 0.3312 | -0.002  | 3.00E-04 | 1.93E-14 | 1197420 | 0.6654 | 0.0029    | 5.00E-04 | 1.04E-08 | 852654 |
| rs1486366 | G | A |      | 0.9123 | -0.0049   | 8.00E-04   | 1.59E-09 | 460826 | 0.1008 | -0.0038 | 4.00E-04 | 1.14E-18 | 1201930 | 0.9148 | 0.0045    | 9.00E-04 | 2.78E-07 | 852678 |
| rs151245  | T | G |      | 0.5996 | -0.0029   | 5.00E-04   | 1.05E-09 | 460826 | 0.6069 | -0.0022 | 3.00E-04 | 9.81E-18 | 1178820 | 0.6102 | 0.0031    | 5.00E-04 | 3.01E-10 | 835458 |
| rs1519845 | G | A |      | 0.6213 | -7.00E-04 | 5.00E-04   | 0.1598   | 460826 | 0.3755 | -0.0017 | 3.00E-04 | 1.64E-11 | 1196300 | 0.622  | 0.0014    | 5.00E-04 | 0.006902 | 851729 |
| rs1541939 | T | G |      | 0.7328 | -0.0013   | 5.00E-04   | 0.0129   | 460826 | 0.6803 | -0.0029 | 3.00E-04 | 3.25E-20 | 1062240 | 0.6731 | 0.0024    | 6.00E-04 | 7.92E-05 | 768020 |
| rs154656  | A | T |      | 0.4168 | -0.0029   | 5.00E-04   | 8.16E-10 | 460826 | 0.4273 | -0.0031 | 3.00E-04 | 1.73E-33 | 1193780 | 0.4226 | -0.0017   | 5.00E-04 | 0.001252 | 852646 |
| rs1548945 | C | T |      | 0.4202 | -7.00E-04 | 5.00E-04   | 0.1274   | 460826 | 0.5696 | -0.0037 | 3.00E-04 | 3.26E-47 | 1157170 | 0.4361 | 0.0014    | 5.00E-04 | 0.004606 | 810512 |
| rs166775  | T | C |      | 0.7216 | -0.0016   | 5.00E-04   | 0.0021   | 459184 | 0.6687 | -0.0017 | 3.00E-04 | 1.65E-10 | 1148180 | 0.6676 | 0.0024    | 6.00E-04 | 1.01E-05 | 806468 |
| rs1682302 | A | C |      | 0.0813 | -0.0058   | 8.00E-04   | 4.81E-12 | 460826 | 0.0824 | -0.0053 | 5.00E-04 | 1.08E-27 | 1039920 | 0.0833 | 0.0024    | 0.001    | 0.01006  | 704284 |
| rs1682787 | T | C |      | 0.2399 | -0.0017   | 5.00E-04   | 0.002064 | 460826 | 0.2387 | -0.0018 | 3.00E-04 | 3.72E-08 | 1159620 | 0.2384 | 0.0017    | 6.00E-04 | 0.003325 | 810512 |
| rs1687405 | A | G |      | 0.9519 | -0.0062   | 0.0011     | 1.17E-08 | 460826 | 0.9512 | -0.0044 | 6.00E-04 | 1.34E-13 | 1201880 | 0.9516 | 0.0064    | 0.0011   | 1.64E-08 | 852635 |
| rs1693037 | C | T |      | 0.8267 | -0.0012   | 6.00E-04   | 0.04197  | 460826 | 0.1713 | -0.0042 | 3.00E-04 | 1.36E-34 | 1196300 | 0.8283 | 0.001     | 6.00E-04 | 0.1232   | 851729 |
| rs1705027 | A | G |      | 0.4082 | -0.0046   | 5.00E-04   | 2.89E-22 | 460826 | 0.4264 | -0.0028 | 3.00E-04 | 7.08E-28 | 1190890 | 0.4181 | 0.0042    | 5.00E-04 | 3.08E-17 | 851729 |
| rs1711667 | T | G |      | 0.5856 | -0.0022   | 5.00E-04   | 1.78E-06 | 460826 | 0.5974 | -0.0017 | 3.00E-04 | 8.55E-11 | 1196300 | 0.6062 | 3.00E-04  | 5.00E-04 | 0.5406   | 851729 |
| rs1713842 | T | A |      | 0.1442 | -0.0033   | 7.00E-04   | 5.01E-07 | 460826 | 0.8579 | -0.0024 | 3.00E-04 | 1.68E-11 | 1183200 | 0.1387 | 0.0037    | 7.00E-04 | 1.45E-07 | 845094 |
| rs1719935 | G | A |      | 0.5304 | -0.0012   | 5.00E-04   | 0.007032 | 460826 | 0.451  | -0.0026 | 3.00E-04 | 4.08E-24 | 1201720 | 0.5554 | 0         | 5.00E-04 | 0.9758   | 852474 |
| rs1721670 | T | C |      | 0.8119 | -0.0066   | 6.00E-04   | 2.69E-28 | 460826 | 0.81   | -0.0048 | 3.00E-04 | 6.88E-46 | 1146580 | 0.8174 | 0.0065    | 7.00E-04 | 7.71E-23 | 801991 |
| rs1741177 | A | G | TRUE | 0.6917 | -9.00E-04 | 5.00E-04   | 0.08729  | 460826 | 0.7031 | -0.0016 | 3.00E-04 | 8.82E-10 | 1156030 | 0.6997 | 0.001     | 5.00E-04 | 0.05375  | 808129 |
| rs1741346 | C | A |      | 0.1854 | -0.0018   | 6.00E-04   | 0.002546 | 460826 | 0.8155 | -0.0025 | 3.00E-04 | 1.15E-13 | 1039940 | 0.1864 | 0.0026    | 7.00E-04 | 0.000132 | 704297 |
| rs1742082 | G | T |      | 0.7238 | -0.0035   | 5.00E-04   | 1.16E-11 | 460826 | 0.2855 | -0.0024 | 3.00E-04 | 5.06E-20 | 1196300 | 0.7127 | 0.0028    | 5.00E-04 | 2.24E-07 | 851729 |
| rs17563   | G | A |      | 0.4365 | -0.0013   | 5.00E-04   | 0.00476  | 460826 | 0.5378 | -0.0017 | 3.00E-04 | 4.29E-11 | 1153490 | 0.4679 | 0.0031    | 5.00E-04 | 2.40E-09 | 809600 |
| rs1757915 | G | A |      | 0.3546 | -0.0027   | 5.00E-04   | 1.11E-08 | 460825 | 0.6587 | -0.0023 | 3.00E-04 | 1.66E-19 | 1192700 | 0.3428 | 0.0024    | 5.00E-04 | 6.86E-06 | 849346 |
| rs1760272 | G | A |      | 0.1245 | -0.0014   | 7.00E-04   | 0.04367  | 460826 | 0.8712 | -0.0028 | 4.00E-04 | 2.34E-10 | 996165  | 0.1286 | 2.00E-04  | 8.00E-04 | 0.7701   | 703273 |
| rs1763807 | C | T | TRUE | 0.4555 | -7.00E-04 | 5.00E-04   | 0.1617   | 460826 | 0.5238 | -0.0016 | 3.00E-04 | 6.49E-10 | 1201590 | 0.4817 | 7.00E-04  | 5.00E-04 | 0.1303   | 852342 |
| rs1771398 | T | C |      | 0.3443 | -0.004    | 5.00E-04   | 4.99E-17 | 460826 | 0.338  | -0.0022 | 3.00E-04 | 1.61E-17 | 1200810 | 0.3317 | 0.0048    | 5.00E-04 | 2.63E-21 | 851570 |
| rs1772976 | C | T |      | 0.5148 | -9.00E-04 | 5.00E-04   | 0.05117  | 460826 | 0.5087 | -0.0016 | 3.00E-04 | 1.42E-10 | 1159620 | 0.4851 | 0.001     | 5.00E-04 | 0.03384  | 810512 |
| rs1773028 | G | A |      | 0.2263 | -0.0051   | 5.00E-04   | 1.93E-20 | 460826 | 0.747  | -0.0043 | 3.00E-04 | 2.44E-54 | 1196300 | 0.2527 | 0.006     | 6.00E-04 | 1.53E-25 | 851729 |
| rs1783827 | A | G |      | 0.563  | -0.0013   | 5.00E-04   | 0.005383 | 460826 | 0.5799 | -0.0019 | 3.00E-04 | 2.03E-13 | 1159620 | 0.5818 | 0         | 5.00E-04 | 0.983    | 810512 |
| rs1800574 | T | C |      | 0.0287 | -0.0031   | 0.0014     | 0.02351  | 460826 | 0.031  | -0.0065 | 8.00E-04 | 8.82E-16 | 1026470 | 0.0307 | 0.0031    | 0.0016   | 0.04724  | 696461 |
| rs1801251 | G | A |      | 0.3605 | -0.0028   | 5.00E-04   | 6.50E-09 | 460826 | 0.6497 | -0.0019 | 3.00E-04 | 7.73E-14 | 1192700 | 0.3534 | 0.0018    | 5.00E-04 | 0.000412 | 849339 |
| rs1844334 | C | T |      | 0.3439 | -8.00E-04 | 5.00E-04   | 0.08774  | 460826 | 0.6346 | -0.002  | 3.00E-04 | 2.55E-14 | 1201880 | 0.3692 | 0.0016    | 5.00E-04 | 0.003462 | 852627 |
| rs1851285 | G | C |      | 0.5253 | -0.0019   | 5.00E-04   | 3.49E-05 | 460826 | 0.4933 | -0.0015 | 3.00E-04 | 2.58E-09 | 1159620 | 0.499  | 0.0014    | 5.00E-04 | 0.004424 | 810512 |
| rs1855381 | A | G | TRUE | 0.9891 | 0.0029    | 0.0023     | 0.2114   | 436765 | 0.9895 | -0.0086 | 0.0014   | 1.34E-09 | 959897  | 0.9893 | 0.002     | 0.0027   | 0.4621   | 637372 |
| rs1857859 | G | A |      | 0.2706 | -0.001    | 5.00E-04   | 0.0512   | 460826 | 0.7062 | -0.0018 | 3.00E-04 | 6.33E-11 | 1191260 | 0.2979 | 0.0025    | 5.00E-04 | 1.36E-06 | 849346 |
| rs1858800 | C | T |      | 0.3403 | -0.0018   | 5.00E-04   | 0.000242 | 460826 | 0.6694 | -0.0022 | 3.00E-04 | 7.09E-18 | 1191750 | 0.3318 | -0.0012   | 5.00E-04 | 0.02154  | 848392 |
| rs1873576 | G | C |      | 0.9752 | -0.0141   | 0.0015     | 6.19E-22 | 460826 | 0.0276 | -0.0116 | 9.00E-04 | 4.16E-40 | 980431  | 0.9732 | 0.0155    | 0.0017   | 1.22E-19 | 649909 |
| rs1887252 | C | G |      | 0.6358 | -0.0032   | 5.00E-04   | 1.77E-11 | 460826 | 0.6263 | -0.0024 | 3.00E-04 | 6.08E-20 | 1201560 | 0.6239 | 0.0044    | 5.00E-04 | 1.31E-18 | 852310 |
| rs1913641 | T | G |      | 0.4791 | -0.0012   | 5.00E-04</ |          |        |        |         |          |          |         |        |           |          |          |        |

|            |   |   |      |        |           |          |           |        |        |         |          |           |         |        |           |          |          |        |
|------------|---|---|------|--------|-----------|----------|-----------|--------|--------|---------|----------|-----------|---------|--------|-----------|----------|----------|--------|
| rs246234   | G | C | TRUE | 0.305  | -0.001    | 5.00E-04 | 0.0562    | 460826 | 0.6988 | -0.0016 | 3.00E-04 | 2.19E-09  | 1201730 | 0.3016 | 0.001     | 5.00E-04 | 0.05489  | 852484 |
| rs2469953  | T | C |      | 0.4005 | -3.00E-04 | 5.00E-04 | 0.4861    | 460826 | 0.4383 | -0.0015 | 3.00E-04 | 1.45E-08  | 1158230 | 0.4331 | 0.0021    | 5.00E-04 | 1.66E-05 | 851729 |
| rs2515414  | C | A | TRUE | 0.4798 | -3.00E-04 | 5.00E-04 | 0.5312    | 460826 | 0.5396 | -0.0014 | 3.00E-04 | 2.55E-08  | 1159620 | 0.4587 | -3.00E-04 | 5.00E-04 | 0.5356   | 810512 |
| rs2551644  | A | T | TRUE | 0.8166 | -8.00E-04 | 6.00E-04 | 0.1958    | 460826 | 0.8068 | -0.0019 | 3.00E-04 | 2.75E-08  | 996356  | 0.8099 | 0         | 7.00E-04 | 0.9455   | 662135 |
| rs2571734  | C | T | TRUE | 0.7508 | -6.00E-04 | 5.00E-04 | 0.277     | 460826 | 0.2902 | -0.0015 | 3.00E-04 | 2.13E-08  | 1159620 | 0.7041 | 0.001     | 6.00E-04 | 0.08488  | 810512 |
| rs2607775  | G | C |      | 0.517  | -0.0015   | 5.00E-04 | 0.001229  | 460826 | 0.479  | -0.0015 | 3.00E-04 | 3.82E-09  | 1201900 | 0.5241 | 8.00E-04  | 5.00E-04 | 0.1128   | 852646 |
| rs2625166  | G | A |      | 0.4313 | -0.0011   | 5.00E-04 | 0.02345   | 436765 | 0.5583 | -0.0014 | 3.00E-04 | 3.43E-08  | 1061440 | 0.4416 | 0.0016    | 5.00E-04 | 0.002798 | 767225 |
| rs2634675  | G | A | TRUE | 0.4561 | -3.00E-04 | 5.00E-04 | 0.4531    | 460826 | 0.5133 | -0.0024 | 3.00E-04 | 3.24E-20  | 1162680 | 0.4853 | 5.00E-04  | 5.00E-04 | 0.3362   | 851501 |
| rs264608   | C | T |      | 0.2669 | -0.0023   | 5.00E-04 | 1.03E-05  | 460826 | 0.6903 | -0.0018 | 3.00E-04 | 3.63E-11  | 1015920 | 0.3109 | 0.0029    | 6.00E-04 | 2.67E-07 | 802092 |
| rs267738   | T | G |      | 0.7853 | -0.0053   | 6.00E-04 | 1.39E-21  | 460826 | 0.7901 | -0.0051 | 3.00E-04 | 8.31E-57  | 1192500 | 0.7902 | 0.0026    | 6.00E-04 | 3.79E-05 | 849148 |
| rs27028    | A | G |      | 0.3715 | -0.0019   | 5.00E-04 | 6.21E-05  | 460826 | 0.3592 | -0.0016 | 3.00E-04 | 6.45E-10  | 1199850 | 0.3577 | 8.00E-04  | 5.00E-04 | 0.1088   | 850616 |
| rs2720526  | G | A | TRUE | 0.7432 | -3.00E-04 | 5.00E-04 | 0.601     | 460826 | 0.253  | -0.0015 | 3.00E-04 | 1.98E-08  | 1201600 | 0.7496 | -1.00E-04 | 6.00E-04 | 0.8181   | 852353 |
| rs2749153  | A | G | TRUE | 0.7322 | -8.00E-04 | 5.00E-04 | 0.1099    | 460826 | 0.7093 | -0.003  | 3.00E-04 | 5.67E-28  | 1200920 | 0.7015 | 0.001     | 5.00E-04 | 0.05143  | 851673 |
| rs2780955  | A | T |      | 0.4115 | -0.001    | 5.00E-04 | 0.03438   | 460826 | 0.3962 | -0.0014 | 3.00E-04 | 3.76E-08  | 1157870 | 0.3962 | 3.00E-04  | 5.00E-04 | 0.54     | 809558 |
| rs2781649  | G | A | TRUE | 0.7736 | -7.00E-04 | 6.00E-04 | 0.2377    | 460826 | 0.241  | -0.003  | 3.00E-04 | 6.20E-21  | 1120110 | 0.7567 | -0.0015   | 6.00E-04 | 0.007398 | 810512 |
| rs280454   | T | C |      | 0.4569 | -0.0021   | 5.00E-04 | 5.55E-06  | 460826 | 0.5196 | -0.0021 | 3.00E-04 | 4.13E-16  | 1201560 | 0.4872 | 0.0019    | 5.00E-04 | 0.000116 | 852309 |
| rs281380   | T | A |      | 0.6349 | -0.0022   | 5.00E-04 | 5.70E-06  | 460826 | 0.5954 | -0.0021 | 3.00E-04 | 8.72E-16  | 1151060 | 0.5966 | -0.0047   | 5.00E-04 | 5.15E-19 | 808573 |
| rs2815374  | A | G |      | 0.6507 | -0.0041   | 5.00E-04 | 3.78E-17  | 460826 | 0.6614 | -0.0018 | 3.00E-04 | 1.41E-11  | 1159620 | 0.6649 | 0.0052    | 5.00E-04 | 1.34E-22 | 810512 |
| rs2823139  | A | G |      | 0.3369 | -0.0038   | 5.00E-04 | 7.46E-15  | 460826 | 0.3332 | -0.0031 | 3.00E-04 | 7.20E-32  | 1192740 | 0.3298 | 0.0045    | 5.00E-04 | 5.04E-19 | 850634 |
| rs2834320  | G | A |      | 0.8385 | -0.0055   | 6.00E-04 | 2.06E-18  | 460826 | 0.1555 | -0.0036 | 3.00E-04 | 3.68E-25  | 1200960 | 0.8425 | 0.0028    | 7.00E-04 | 3.74E-05 | 851715 |
| rs284859   | G | T |      | 0.1733 | -0.0019   | 6.00E-04 | 0.001391  | 460826 | 0.8065 | -0.0029 | 3.00E-04 | 7.34E-18  | 1193350 | 0.1894 | 0.0013    | 6.00E-04 | 0.04938  | 849993 |
| rs28490558 | A | G |      | 0.2445 | -0.0018   | 5.00E-04 | 0.000554  | 456193 | 0.2491 | -0.0021 | 3.00E-04 | 2.43E-11  | 1057600 | 0.246  | 0.0016    | 6.00E-04 | 0.01128  | 775317 |
| rs2873542  | G | T |      | 0.9381 | -0.0047   | 0.001    | 1.45E-06  | 460826 | 0.0711 | -0.0033 | 5.00E-04 | 1.91E-10  | 1152640 | 0.9272 | 0.0017    | 0.001    | 0.09993  | 812583 |
| rs2880624  | C | T | TRUE | 0.5936 | 2.00E-04  | 5.00E-04 | 0.747     | 460826 | 0.3986 | -0.0014 | 3.00E-04 | 2.88E-08  | 1145740 | 0.6013 | 9.00E-04  | 5.00E-04 | 0.07927  | 796624 |
| rs2881741  | T | C |      | 0.4552 | -0.0115   | 5.00E-04 | 4.51E-132 | 436765 | 0.425  | -0.0078 | 3.00E-04 | 2.41E-206 | 1201870 | 0.424  | 0.0076    | 5.00E-04 | 2.70E-54 | 852621 |
| rs288753   | G | A |      | 0.3593 | -0.0047   | 5.00E-04 | 3.30E-22  | 456193 | 0.6513 | -0.0027 | 3.00E-04 | 2.79E-25  | 1138740 | 0.3453 | 0.0017    | 5.00E-04 | 0.001186 | 804313 |
| rs2891028  | C | T |      | 0.326  | -0.0015   | 5.00E-04 | 0.002761  | 460826 | 0.6939 | -0.0029 | 3.00E-04 | 5.70E-29  | 1150880 | 0.3098 | 0.0022    | 5.00E-04 | 4.55E-05 | 808345 |
| rs2906163  | C | T | TRUE | 0.6487 | -9.00E-04 | 5.00E-04 | 0.07282   | 460826 | 0.3352 | -0.0014 | 3.00E-04 | 2.81E-08  | 1153920 | 0.6616 | 0.001     | 5.00E-04 | 0.06978  | 804814 |
| rs2953516  | C | T |      | 0.2416 | -0.0023   | 5.00E-04 | 1.39E-05  | 460826 | 0.705  | -0.0026 | 3.00E-04 | 3.59E-22  | 1201540 | 0.3027 | 7.00E-04  | 5.00E-04 | 0.2049   | 852288 |
| rs2954017  | C | T |      | 0.4768 | -0.002    | 5.00E-04 | 1.61E-05  | 460826 | 0.5308 | -0.0029 | 3.00E-04 | 1.13E-30  | 1121560 | 0.4719 | -0.0016   | 5.00E-04 | 0.000773 | 810512 |
| rs2991341  | T | C |      | 0.4131 | -0.0018   | 5.00E-04 | 7.81E-05  | 460826 | 0.3907 | -0.0019 | 3.00E-04 | 9.90E-14  | 1159620 | 0.389  | 6.00E-04  | 5.00E-04 | 0.2616   | 810512 |
| rs303937   | T | A |      | 0.4044 | -0.0044   | 5.00E-04 | 3.47E-21  | 460826 | 0.5636 | -0.0028 | 3.00E-04 | 2.73E-27  | 1159620 | 0.4396 | 0.0059    | 5.00E-04 | 4.38E-30 | 810512 |
| rs3060     | C | T |      | 0.9057 | -0.0025   | 8.00E-04 | 0.001856  | 460826 | 0.157  | -0.0022 | 4.00E-04 | 8.35E-09  | 1192700 | 0.831  | 6.00E-04  | 7.00E-04 | 0.4165   | 849346 |
| rs3111257  | T | C |      | 0.5613 | -0.0013   | 5.00E-04 | 0.006421  | 460826 | 0.5622 | -0.0015 | 3.00E-04 | 1.45E-08  | 1201870 | 0.5628 | 0.0024    | 5.00E-04 | 1.69E-06 | 852623 |
| rs3119304  | C | T | TRUE | 0.8704 | -7.00E-04 | 7.00E-04 | 0.3307    | 460826 | 0.1206 | -0.0084 | 4.00E-04 | 1.07E-96  | 1158180 | 0.8756 | 5.00E-04  | 8.00E-04 | 0.5554   | 810512 |
| rs3417403  | A | G |      | 0.0233 | -0.0047   | 0.0015   | 0.002279  | 460826 | 0.023  | -0.0055 | 0.001    | 1.95E-08  | 922953  | 0.0231 | 0.0053    | 0.0019   | 0.004449 | 631019 |
| rs3418829  | C | G |      | 0.2694 | -0.0018   | 5.00E-04 | 0.000892  | 451330 | 0.2832 | -0.0017 | 3.00E-04 | 4.11E-08  | 1075140 | 0.2939 | 0.0018    | 6.00E-04 | 0.001646 | 753729 |
| rs3429313  | T | C |      | 0.6936 | -0.0028   | 5.00E-04 | 1.19E-08  | 460826 | 0.6963 | -0.0024 | 3.00E-04 | 2.02E-19  | 1201860 | 0.7062 | 8.00E-04  | 5.00E-04 | 0.1356   | 852609 |
| rs3435713  | G | C |      | 0.7358 | -0.0025   | 5.00E-04 | 1.58E-06  | 460826 | 0.7315 | -0.0028 | 3.00E-04 | 1.25E-25  | 1159620 | 0.7364 | 0.0021    | 6.00E-04 | 0.000129 | 810512 |
| rs3444253  | G | C |      | 0.6825 | -0.0027   | 5.00E-04 | 1.08E-07  | 460826 | 0.3151 | -0.0019 | 3.00E-04 | 4.70E-13  | 1159120 | 0.6864 | 0         | 5.00E-04 | 0.9784   | 810011 |
| rs3446034  | T | C | TRUE | 0.9211 | -9.00E-04 | 8.00E-04 | 0.2674    | 460826 | 0.9149 | -0.0034 | 5.00E-04 | 2.10E-12  | 1043920 | 0.9199 | 0         | 0.001    | 0.969    | 703352 |
| rs3486176  | T | C |      | 0.4096 | -0.0074   | 5.00E-04 | 2.65E-56  | 460826 | 0.4006 | -0.0048 | 3.00E-04 | 7.42E-79  | 1201860 | 0.3911 | 0.0044    | 5.00E-04 | 2.12E-19 | 852608 |
| rs3495002  | G | A | TRUE | 0.3166 | 5.00E-04  | 5.00E-04 | 0.3459    | 460826 | 0.6862 | -0.0024 | 3.00E-04 | 1.11E-20  | 1158180 | 0.3155 | -2.00E-04 | 5.00E-04 | 0.6547   | 810512 |
| rs3507210  | A | G |      | 0.5347 | -0.0014   | 5.00E-04 | 0.003053  | 460826 | 0.5569 | -0.0019 | 3.00E-04 | 4.64E-14  | 1200870 | 0.554  | 0.0011    | 5.00E-04 | 0.03036  | 851618 |
| rs3591557  | C | T |      | 0.405  | -0.0028   | 5.00E-04 | 1.55E-09  | 460826 | 0.5907 | -0.0022 | 3.00E-04 | 3.67E-17  | 1159620 | 0.4049 | 0.0021    | 5.00E-04 | 1.93E-05 | 810512 |
| rs3596577  | T | G |      | 0.4087 | -0.0035   | 5.00E-04 | 4.65E-14  | 460826 | 0.3946 | -0.0056 | 3.00E-04 | 1.14E-106 | 1159620 | 0.3939 | 0.0022    | 5.00E-04 | 2.28E-05 | 810512 |
| rs3750081  | T | G |      | 0.59   | -0.0012   | 5.00E-04 | 0.00955   | 460826 | 0.5917 | -0.0022 | 3.00E-04 | 6.60E-18  | 1159620 | 0.588  | -1.00E-04 | 5.00E-04 | 0.857    | 810512 |
| rs3755880  | A | G |      | 0.2856 | -0.0021   | 5.00E-04 | 5.27E-05  | 460826 | 0.2878 | -0.0015 | 3.00E-04 | 2.19E-08  | 1201590 | 0.2917 | -1.00E-04 | 5.00E-04 | 0.7811   | 852342 |
| rs3757387  | C | T |      | 0.552  | -0.0063   | 5.00E-04 | 2.40E-42  | 460826 | 0.4301 | -0.0027 | 3.00E-04 | 6.54E-27  | 1158180 | 0.5718 | 0.002     | 5.00E-04 | 0.000111 | 810512 |
| rs3775932  | A | C |      | 0.4935 | -9.00E-04 | 5.00E-04 | 0.04077   | 460826 | 0.5024 | -0.0019 | 3.00E-04 | 3.25E-14  | 1159620 | 0.5002 | 9.00E-04  | 5.00E-04 | 0.08085  | 810512 |
| rs379491   | T | C |      | 0.0847 | -0.0045   | 8.00E-04 | 5.43E-08  | 460826 | 0.0879 | -0.0033 | 4.00E-04 | 5.85E-14  | 1201800 | 0.0893 | 1.00E-04  | 9.00E-04 | 0.9158   | 852556 |
| rs3795503  | C | T |      | 0.3145 | -0.0029   | 5.00E-04 | 7.61E-09  | 460826 | 0.6591 | -0.0023 | 3.00E-04 | 3.31E-18  | 1157170 | 0.3358 | 0.0024    | 5.00E-04 | 7.98E-06 | 810512 |
| rs3809627  | C | A |      | 0.4041 | -0.0016   | 5.00E-04 | 0.000767  | 456193 | 0.5658 | -0.0015 | 3.00E-04 | 1.27E-08  | 1157900 | 0.4392 | 6.00E-04  | 5.00E-04 | 0.2043   | 809561 |
| rs3814995  | C | T |      | 0.3121 | -0.0013   | 5.00E-04 | 0.01164   | 450809 | 0.6583 | -0.0023 | 3.00E-04 | 3.43E-14  | 1106950 | 0.3573 | 0.0023    | 5.00E-04 | 2.63E-05 | 802502 |
| rs3820201  | A | G |      | 0.6158 | -8.00E-04 | 5.00E-04 | 0.1018    | 460826 | 0.5826 | -0.0016 | 3.00E-04 | 5.81E-10  | 1153040 | 0.5752 | 0.0025    | 5.00E-04 | 1.67E-06 | 808607 |
| rs3842761  | G | C |      | 0.2407 | -0.0047   | 6.00E-04 | 2.47E-17  | 436765 | 0.7256 | -0.0038 | 3.00E-04 | 5.64E-33  | 1134100 | 0.2878 | 0.0045    | 6.00E-04 | 4.52E-15 | 802777 |
| rs3850625  | G | C |      | 0.1158 | -0.0013   | 7.00E-04 | 0.07429   | 460826 | 0.881  | -0.0049 | 4.00E-04 | 1.59E-32  | 1174580 | 0.1154 | 0.0022    | 8.00E-04 | 0.007637 | 831446 |
| rs3918226  | T | A |      | 0.08   | -0.0041   | 9.00E-04 | 1.39E-06  | 460826 | 0.0826 | -0.0033 | 5.00E-04 | 2.51E-11  | 1017730 | 0.082  | 0.0015    | 0.001    | 0.1295   | 698833 |
| rs3925003  | T | C | TRUE | 0.5697 | -9.00E-04 | 5.00E-04 | 0.0569    | 460826 | 0.575  | -0.0016 | 3.00E-04 | 1.11E-09  | 1191260 | 0.5778 | 9.00E-04  | 5.00E-04 | 0.0557   | 849346 |
| rs4128481  | T | G |      | 0.01   |           |          |           |        |        |         |          |           |         |        |           |          |          |        |

|            |   |   |      |        |           |          |          |        |        |         |          |          |         |        |           |          |           |        |
|------------|---|---|------|--------|-----------|----------|----------|--------|--------|---------|----------|----------|---------|--------|-----------|----------|-----------|--------|
| rs595086   | G | A |      | 0.3163 | -0.001    | 5.00E-04 | 0.03326  | 460826 | 0.6857 | -0.0015 | 3.00E-04 | 3.14E-08 | 1157420 | 0.3087 | -6.00E-04 | 5.00E-04 | 0.2363    | 809524 |
| rs5964675  | T | G |      | 0.3088 | -0.0057   | 5.00E-04 | 2.78E-30 | 460826 | 0.3043 | -0.0024 | 3.00E-04 | 1.68E-19 | 1195880 | 0.3057 | 0.0054    | 5.00E-04 | 4.09E-26  | 852369 |
| rs5986044  | C | T |      | 0.3263 | -0.0013   | 5.00E-04 | 0.01138  | 460826 | 0.6874 | -0.002  | 3.00E-04 | 1.24E-14 | 1159620 | 0.3108 | 0.001     | 5.00E-04 | 0.06266   | 810512 |
| rs6029640  | A | G |      | 0.577  | -0.0011   | 5.00E-04 | 0.02115  | 460826 | 0.5747 | -0.0019 | 3.00E-04 | 4.99E-13 | 1017230 | 0.5774 | 5.00E-04  | 5.00E-04 | 0.389     | 670586 |
| rs6055116  | C | T |      | 0.7697 | -0.0029   | 5.00E-04 | 1.13E-07 | 460826 | 0.2736 | -0.0017 | 3.00E-04 | 1.19E-09 | 1201600 | 0.723  | 0.0013    | 6.00E-04 | 0.02241   | 852349 |
| rs6055748  | A | G |      | 0.6968 | -0.0018   | 5.00E-04 | 0.000393 | 460826 | 0.6915 | -0.0018 | 3.00E-04 | 7.28E-09 | 1035260 | 0.6952 | 0.0032    | 6.00E-04 | 1.65E-08  | 704303 |
| rs60580012 | T | C |      | 0.334  | -0.0017   | 5.00E-04 | 0.000681 | 460826 | 0.3216 | -0.0018 | 3.00E-04 | 4.24E-12 | 1159620 | 0.3271 | 0.0014    | 5.00E-04 | 0.00723   | 810512 |
| rs6069199  | T | C |      | 0.6639 | -0.0018   | 5.00E-04 | 0.000315 | 460826 | 0.6715 | -0.0016 | 3.00E-04 | 4.61E-08 | 1158870 | 0.6712 | 7.00E-04  | 6.00E-04 | 0.233     | 810011 |
| rs6098018  | A | T |      | 0.139  | -0.0018   | 7.00E-04 | 0.005679 | 460826 | 0.157  | -0.0027 | 4.00E-04 | 2.90E-14 | 1198980 | 0.1581 | -1.00E-04 | 7.00E-04 | 0.91      | 852871 |
| rs6099155  | A | C | TRUE | 0.1314 | -0.001    | 7.00E-04 | 0.159    | 460826 | 0.166  | -0.0019 | 4.00E-04 | 4.93E-08 | 1201720 | 0.169  | -4.00E-04 | 7.00E-04 | 0.5845    | 852467 |
| rs6131194  | A | G |      | 0.9209 | -0.0048   | 9.00E-04 | 4.43E-08 | 460826 | 0.8792 | -0.0028 | 4.00E-04 | 5.61E-10 | 1142110 | 0.8716 | 6.00E-04  | 8.00E-04 | 0.4643    | 793206 |
| rs6132786  | A | G |      | 0.1243 | -0.0028   | 7.00E-04 | 5.57E-05 | 460826 | 0.1331 | -0.0029 | 4.00E-04 | 1.70E-12 | 994592  | 0.1275 | 0.0033    | 8.00E-04 | 3.51E-05  | 661634 |
| rs6148280  | C | G | TRUE | 0.6756 | 6.00E-04  | 5.00E-04 | 0.1907   | 456193 | 0.6824 | -0.0021 | 3.00E-04 | 1.49E-15 | 1131240 | 0.6864 | 5.00E-04  | 5.00E-04 | 0.3349    | 795370 |
| rs6154649  | A | C |      | 0.3353 | -0.0022   | 5.00E-04 | 7.60E-06 | 459184 | 0.3267 | -0.0016 | 3.00E-04 | 9.15E-10 | 1200900 | 0.3243 | 0.0014    | 5.00E-04 | 0.006561  | 851650 |
| rs6183029  | A | C | TRUE | 0.9061 | -0.0012   | 8.00E-04 | 0.1155   | 460826 | 0.9022 | -0.004  | 5.00E-04 | 1.42E-17 | 993896  | 0.9029 | -0.0011   | 9.00E-04 | 0.2315    | 662135 |
| rs6191026  | G | T |      | 0.5721 | -6.00E-04 | 5.00E-04 | 0.1943   | 460826 | 0.4106 | -0.0014 | 3.00E-04 | 1.60E-08 | 1159620 | 0.5875 | 0.0027    | 5.00E-04 | 2.35E-07  | 810512 |
| rs6203508  | G | A |      | 0.1681 | -0.0035   | 6.00E-04 | 1.30E-08 | 459184 | 0.8358 | -0.0027 | 3.00E-04 | 6.73E-16 | 1154210 | 0.1657 | 0.0024    | 7.00E-04 | 0.000433  | 810512 |
| rs6207198  | T | C |      | 0.0393 | -0.0046   | 0.0012   | 9.41E-05 | 460826 | 0.041  | -0.0041 | 7.00E-04 | 6.25E-09 | 986333  | 0.0407 | -0.0122   | 0.0014   | 8.08E-19  | 657961 |
| rs6218753  | C | T |      | 0.0664 | -0.0042   | 9.00E-04 | 5.81E-06 | 460826 | 0.9327 | -0.0037 | 6.00E-04 | 2.07E-11 | 1039570 | 0.0678 | 0.0024    | 0.001    | 0.02142   | 703933 |
| rs622076   | A | G |      | 0.1583 | -0.0071   | 6.00E-04 | 3.74E-28 | 436765 | 0.1501 | -0.004  | 4.00E-04 | 1.16E-25 | 1193290 | 0.1484 | 0.0016    | 7.00E-04 | 0.023     | 851473 |
| rs6232522  | G | T |      | 0.1486 | -0.002    | 6.00E-04 | 0.002313 | 460826 | 0.856  | -0.0022 | 3.00E-04 | 3.33E-10 | 1201910 | 0.1496 | 4.00E-04  | 7.00E-04 | 0.5157    | 852865 |
| rs6233028  | A | G |      | 0.515  | -0.0034   | 5.00E-04 | 2.61E-13 | 436765 | 0.4959 | -0.002  | 3.00E-04 | 1.97E-15 | 1201880 | 0.4923 | 0.0024    | 5.00E-04 | 7.16E-07  | 852828 |
| rs6243514  | T | G |      | 0.6856 | -0.0068   | 5.00E-04 | 3.12E-39 | 451330 | 0.6447 | -0.0066 | 3.00E-04 | 8.01E-99 | 1057620 | 0.6315 | 0.0128    | 6.00E-04 | 2.19E-109 | 756284 |
| rs6249153  | T | C |      | 0.8331 | -0.0017   | 6.00E-04 | 0.004991 | 460826 | 0.8201 | -0.0027 | 3.00E-04 | 3.87E-15 | 1200420 | 0.8226 | 0.0017    | 6.00E-04 | 0.009637  | 852623 |
| rs6261869  | C | T |      | 0.044  | -0.007    | 0.0011   | 2.47E-10 | 460826 | 0.9559 | -0.0038 | 7.00E-04 | 2.51E-08 | 1019000 | 0.0446 | 0.0037    | 0.0013   | 0.004344  | 695717 |
| rs6445924  | G | A |      | 0.1739 | -0.0015   | 6.00E-04 | 0.01562  | 460826 | 0.8275 | -0.0019 | 3.00E-04 | 1.05E-08 | 1039920 | 0.1737 | 8.00E-04  | 7.00E-04 | 0.2426    | 704285 |
| rs6453319  | C | A | TRUE | 0.4532 | -7.00E-04 | 5.00E-04 | 0.1557   | 460826 | 0.5741 | -0.0014 | 3.00E-04 | 3.85E-08 | 973658  | 0.4266 | 7.00E-04  | 5.00E-04 | 0.1655    | 759969 |
| rs6458868  | T | C |      | 0.6485 | -0.0031   | 5.00E-04 | 1.91E-10 | 460826 | 0.6589 | -0.002  | 3.00E-04 | 2.08E-14 | 1200420 | 0.6613 | 0.0037    | 5.00E-04 | 2.93E-12  | 852621 |
| rs6468118  | C | G |      | 0.3849 | -0.0013   | 5.00E-04 | 0.005866 | 460826 | 0.3713 | -0.002  | 3.00E-04 | 2.92E-15 | 1200740 | 0.3661 | 0.0012    | 5.00E-04 | 0.0138    | 851502 |
| rs6481598  | G | A |      | 0.7883 | -0.0019   | 6.00E-04 | 0.000626 | 460826 | 0.2104 | -0.0022 | 3.00E-04 | 3.42E-11 | 1201640 | 0.7934 | 4.00E-04  | 6.00E-04 | 0.4868    | 852387 |
| rs6540119  | T | C | TRUE | 0.3256 | -9.00E-04 | 5.00E-04 | 0.06234  | 460826 | 0.643  | -0.0015 | 3.00E-04 | 3.20E-08 | 1153890 | 0.3542 | 8.00E-04  | 5.00E-04 | 0.1395    | 810512 |
| rs6541410  | C | G |      | 0.6338 | -0.002    | 5.00E-04 | 2.12E-05 | 460826 | 0.6258 | -0.0015 | 3.00E-04 | 6.68E-09 | 1121560 | 0.6276 | 0.0014    | 5.00E-04 | 0.005472  | 810512 |
| rs660931   | C | T |      | 0.2545 | -0.0017   | 5.00E-04 | 0.001811 | 460826 | 0.6837 | -0.0016 | 3.00E-04 | 5.67E-09 | 1197970 | 0.319  | 0.0017    | 6.00E-04 | 0.00245   | 848932 |
| rs665731   | T | C |      | 0.1909 | -0.0026   | 6.00E-04 | 1.60E-05 | 460826 | 0.1844 | -0.0021 | 3.00E-04 | 1.36E-10 | 1174480 | 0.1823 | 0.002     | 7.00E-04 | 0.002641  | 830772 |
| rs6700683  | T | A |      | 0.4719 | -0.0019   | 5.00E-04 | 7.15E-05 | 436765 | 0.551  | -0.0022 | 3.00E-04 | 1.61E-17 | 1115340 | 0.4466 | 0.0014    | 5.00E-04 | 0.005865  | 814907 |
| rs6707326  | G | A | TRUE | 0.5657 | 0         | 5.00E-04 | 0.9285   | 460826 | 0.4469 | -0.0016 | 3.00E-04 | 2.42E-10 | 1147110 | 0.5567 | -0.0014   | 5.00E-04 | 0.01071   | 802942 |
| rs6708702  | A | G |      | 0.294  | -0.0017   | 5.00E-04 | 0.000813 | 460826 | 0.3531 | -0.0019 | 3.00E-04 | 8.87E-13 | 1195810 | 0.3501 | 0.0028    | 5.00E-04 | 3.70E-07  | 851729 |
| rs677998   | A | G | TRUE | 0.5339 | 3.00E-04  | 5.00E-04 | 0.504    | 460826 | 0.5272 | -0.0017 | 3.00E-04 | 6.20E-11 | 1196300 | 0.5251 | -6.00E-04 | 5.00E-04 | 0.19      | 851729 |
| rs6786150  | G | A |      | 0.6614 | -0.0021   | 5.00E-04 | 2.08E-05 | 460826 | 0.3233 | -0.0016 | 3.00E-04 | 2.30E-09 | 1158670 | 0.678  | -4.00E-04 | 5.00E-04 | 0.4333    | 809561 |
| rs688540   | A | G |      | 0.8638 | -0.004    | 7.00E-04 | 2.36E-09 | 460825 | 0.8667 | -0.0025 | 4.00E-04 | 1.95E-10 | 972754  | 0.8627 | 0.0014    | 8.00E-04 | 0.07666   | 646251 |
| rs6968865  | A | T |      | 0.3778 | -0.0015   | 5.00E-04 | 0.001983 | 460826 | 0.4043 | -0.0023 | 3.00E-04 | 1.13E-19 | 1197150 | 0.4136 | 0.0031    | 5.00E-04 | 5.65E-10  | 852586 |
| rs7005025  | C | A |      | 0.3672 | -0.0022   | 5.00E-04 | 4.19E-06 | 460826 | 0.6423 | -0.002  | 3.00E-04 | 5.01E-15 | 1158520 | 0.36   | 5.00E-04  | 5.00E-04 | 0.3378    | 809417 |
| rs700753   | G | C |      | 0.3453 | -0.0044   | 5.00E-04 | 5.13E-20 | 460826 | 0.6684 | -0.0032 | 3.00E-04 | 1.09E-35 | 1201580 | 0.3331 | 0.0042    | 5.00E-04 | 3.00E-15  | 852330 |
| rs7012637  | A | C | TRUE | 0.4773 | -7.00E-04 | 5.00E-04 | 0.1409   | 460826 | 0.5118 | -0.0027 | 3.00E-04 | 4.33E-26 | 1145310 | 0.4938 | 3.00E-04  | 5.00E-04 | 0.5372    | 801988 |
| rs7017848  | A | G |      | 0.4058 | -0.0012   | 5.00E-04 | 0.00926  | 460826 | 0.3932 | -0.0014 | 3.00E-04 | 4.14E-08 | 1148190 | 0.3918 | 0         | 5.00E-04 | 0.986     | 804814 |
| rs7027509  | T | C | TRUE | 0.3287 | 7.00E-04  | 5.00E-04 | 0.1724   | 460826 | 0.3243 | -0.0016 | 3.00E-04 | 3.66E-10 | 1190590 | 0.3226 | 5.00E-04  | 5.00E-04 | 0.3542    | 852051 |
| rs7086663  | A | T |      | 0.3961 | -0.0011   | 5.00E-04 | 0.02266  | 460826 | 0.3821 | -0.0014 | 3.00E-04 | 2.91E-08 | 1142680 | 0.3889 | -3.00E-04 | 5.00E-04 | 0.5329    | 800153 |
| rs7087356  | T | A |      | 0.5047 | -0.0022   | 5.00E-04 | 1.23E-06 | 460826 | 0.4901 | -0.0018 | 3.00E-04 | 2.92E-12 | 1159620 | 0.5091 | 0.0026    | 5.00E-04 | 2.56E-07  | 810512 |
| rs7088058  | C | T |      | 0.4085 | -0.0016   | 5.00E-04 | 0.000506 | 460826 | 0.6159 | -0.0015 | 3.00E-04 | 3.17E-09 | 1200500 | 0.3828 | 3.00E-04  | 5.00E-04 | 0.5524    | 851263 |
| rs7131509  | C | T |      | 0.6532 | -0.0021   | 5.00E-04 | 1.15E-05 | 460826 | 0.3751 | -0.0021 | 3.00E-04 | 1.91E-16 | 1159620 | 0.6139 | 0.0025    | 5.00E-04 | 1.72E-06  | 810512 |
| rs7160672  | T | A |      | 0.7773 | -0.0012   | 6.00E-04 | 0.02405  | 460826 | 0.2253 | -0.0022 | 3.00E-04 | 6.48E-12 | 1201880 | 0.784  | 1.00E-04  | 6.00E-04 | 0.8687    | 852626 |
| rs7161243  | T | C | TRUE | 0.7378 | 6.00E-04  | 5.00E-04 | 0.2835   | 460826 | 0.7177 | -0.0016 | 3.00E-04 | 3.83E-09 | 1159620 | 0.7142 | 0         | 6.00E-04 | 0.9891    | 810512 |
| rs7169629  | G | C | TRUE | 0.5164 | -5.00E-04 | 5.00E-04 | 0.2528   | 460826 | 0.5015 | -0.0019 | 3.00E-04 | 2.92E-14 | 1196050 | 0.4914 | 6.00E-04  | 5.00E-04 | 0.2485    | 852532 |
| rs7178859  | T | C |      | 0.2093 | -0.002    | 6.00E-04 | 0.000423 | 460826 | 0.2118 | -0.0024 | 3.00E-04 | 2.36E-13 | 996528  | 0.2125 | 0.0016    | 7.00E-04 | 0.01282   | 661040 |
| rs7196485  | G | T |      | 0.707  | -0.0044   | 5.00E-04 | 1.62E-18 | 460826 | 0.2808 | -0.0027 | 3.00E-04 | 6.20E-24 | 1200970 | 0.718  | 0.0039    | 5.00E-04 | 9.38E-13  | 851721 |
| rs7199123  | T | A |      | 0.699  | -0.0017   | 5.00E-04 | 0.000664 | 460826 | 0.3058 | -0.0015 | 3.00E-04 | 2.31E-08 | 1195850 | 0.691  | 0         | 5.00E-04 | 0.9821    | 852339 |
| rs7248248  | A | T |      | 0.4305 | -0.0015   | 5.00E-04 | 0.000975 | 460826 | 0.4379 | -0.0018 | 3.00E-04 | 1.30E-12 | 1017230 | 0.4343 | 7.00E-04  | 5.00E-04 | 0.216     | 670586 |
| rs7259073  | C | T |      | 0.9288 | -0.0048   | 9.00E-04 | 3.42E-07 | 456193 | 0.0859 | -0.0038 | 6.00E-04 | 1.59E-10 | 896111  | 0.9304 | 0.0045    | 0.0011   | 5.83E-05  | 620251 |
| rs7262902  | G | C |      | 0.8551 | -0.0019   | 7.00E-04 | 0.003989 | 450899 | 0.2361 | -0.0037 | 4.00E-04 | 2.93E-20 | 1045780 | 0.739  | -0.0012   | 7.00E-04 | 0.102     | 757797 |
| rs7268392  | T | C |      | 0.9808 | 0.0028    | 0.0017   | 0        |        |        |         |          |          |         |        |           |          |           |        |

|            |   |   |      |        |           |          |          |        |        |         |          |           |         |        |           |          |          |        |
|------------|---|---|------|--------|-----------|----------|----------|--------|--------|---------|----------|-----------|---------|--------|-----------|----------|----------|--------|
| rs784503   | A | G |      | 0.2316 | -0.0014   | 5.00E-04 | 0.0103   | 460826 | 0.2376 | -0.002  | 3.00E-04 | 6.73E-10  | 1200780 | 0.2297 | 9.00E-04  | 6.00E-04 | 0.1228   | 851530 |
| rs792839   | G | A | TRUE | 0.3366 | 0         | 5.00E-04 | 0.9884   | 460826 | 0.677  | -0.0016 | 3.00E-04 | 1.25E-09  | 1201750 | 0.3214 | 6.00E-04  | 5.00E-04 | 0.2247   | 852504 |
| rs7947897  | T | C |      | 0.6027 | -0.0016   | 5.00E-04 | 0.000448 | 460826 | 0.6173 | -0.0014 | 3.00E-04 | 2.85E-08  | 1159620 | 0.619  | 0.0015    | 5.00E-04 | 0.004302 | 810512 |
| rs795010   | T | A | TRUE | 0.7482 | -4.00E-04 | 5.00E-04 | 0.3965   | 460826 | 0.2624 | -0.0019 | 3.00E-04 | 1.33E-12  | 1201730 | 0.7331 | -0.0014   | 6.00E-04 | 0.01206  | 852484 |
| rs7963577  | C | T |      | 0.7738 | -0.0026   | 5.00E-04 | 3.00E-06 | 460826 | 0.2153 | -0.0022 | 3.00E-04 | 2.02E-11  | 1163680 | 0.7813 | 0.0028    | 6.00E-04 | 2.20E-06 | 852502 |
| rs7983636  | G | A |      | 0.0782 | -9.00E-04 | 9.00E-04 | 0.2756   | 460826 | 0.9221 | -0.0031 | 5.00E-04 | 3.55E-10  | 1196300 | 0.0804 | 0.002     | 9.00E-04 | 0.02655  | 851729 |
| rs79865452 | A | G |      | 0.9778 | -0.0051   | 0.0016   | 0.001438 | 452343 | 0.9785 | -0.0071 | 0.001    | 3.11E-12  | 891722  | 0.9781 | 0.0042    | 0.0019   | 0.02814  | 619862 |
| rs8013847  | C | T |      | 0.1109 | -0.0048   | 7.00E-04 | 4.20E-11 | 460826 | 0.8886 | -0.0062 | 4.00E-04 | 8.64E-50  | 1047260 | 0.1119 | 0.0054    | 8.00E-04 | 4.05E-11 | 711621 |
| rs8028210  | T | A |      | 0.915  | -0.0087   | 8.00E-04 | 2.38E-25 | 460826 | 0.0868 | -0.0081 | 5.00E-04 | 2.91E-62  | 1201760 | 0.9136 | 0.0066    | 9.00E-04 | 2.03E-14 | 852514 |
| rs8058927  | G | A |      | 0.1473 | -0.0042   | 7.00E-04 | 1.77E-10 | 460826 | 0.841  | -0.0025 | 4.00E-04 | 1.12E-12  | 1190560 | 0.1607 | 0.0025    | 7.00E-04 | 0.000158 | 851729 |
| rs8065496  | T | C | TRUE | 0.3853 | 7.00E-04  | 5.00E-04 | 0.1631   | 459184 | 0.3985 | -0.0014 | 3.00E-04 | 4.29E-08  | 1150660 | 0.395  | -0.001    | 5.00E-04 | 0.05259  | 844159 |
| rs8073316  | T | A |      | 0.3019 | -0.0021   | 5.00E-04 | 1.84E-05 | 460826 | 0.6823 | -0.0015 | 3.00E-04 | 5.21E-09  | 1201840 | 0.3138 | 0.0019    | 5.00E-04 | 0.000262 | 852588 |
| rs807624   | G | T |      | 0.3663 | -0.0054   | 5.00E-04 | 4.74E-29 | 460826 | 0.6073 | -0.0035 | 3.00E-04 | 4.89E-41  | 1192700 | 0.4104 | 0.0038    | 5.00E-04 | 5.86E-14 | 849346 |
| rs8096658  | G | C |      | 0.5144 | -0.0039   | 5.00E-04 | 1.25E-16 | 451330 | 0.4723 | -0.0054 | 3.00E-04 | 1.88E-75  | 1059950 | 0.5359 | 0.0064    | 5.00E-04 | 1.10E-32 | 744965 |
| rs8101667  | C | T |      | 0.3418 | -0.005    | 5.00E-04 | 3.58E-25 | 460826 | 0.6316 | -0.0047 | 3.00E-04 | 2.63E-73  | 1201920 | 0.3793 | 0.0021    | 5.00E-04 | 4.10E-05 | 852668 |
| rs81205    | C | A |      | 0.5322 | -0.0025   | 5.00E-04 | 6.47E-08 | 460826 | 0.4787 | -0.003  | 3.00E-04 | 7.12E-32  | 1135770 | 0.5227 | 0.0019    | 5.00E-04 | 0.000298 | 792891 |
| rs836968   | C | T |      | 0.2752 | -0.004    | 5.00E-04 | 1.47E-14 | 460826 | 0.6813 | -0.0018 | 3.00E-04 | 9.80E-12  | 1158670 | 0.3195 | -0.0042   | 6.00E-04 | 7.65E-14 | 809561 |
| rs848446   | A | G |      | 0.2842 | -0.0044   | 5.00E-04 | 5.38E-18 | 460826 | 0.2713 | -0.0041 | 3.00E-04 | 5.91E-54  | 1201720 | 0.2728 | 0.0037    | 5.00E-04 | 1.48E-11 | 852468 |
| rs881858   | A | G |      | 0.6922 | -0.0067   | 5.00E-04 | 1.54E-41 | 460826 | 0.7032 | -0.0054 | 3.00E-04 | 5.10E-93  | 1195490 | 0.7078 | -0.003    | 5.00E-04 | 4.56E-08 | 850920 |
| rs883541   | A | G |      | 0.7681 | 2.00E-04  | 5.00E-04 | 0.7001   | 460825 | 0.7386 | -0.0024 | 3.00E-04 | 6.17E-19  | 1191470 | 0.7399 | 0.0016    | 6.00E-04 | 0.005791 | 848128 |
| rs925612   | T | C | TRUE | 0.482  | -4.00E-04 | 5.00E-04 | 0.3714   | 460826 | 0.4953 | -0.0014 | 3.00E-04 | 2.68E-08  | 1199560 | 0.4993 | 1.00E-04  | 5.00E-04 | 0.8942   | 851525 |
| rs9318186  | G | A | TRUE | 0.4518 | -4.00E-04 | 5.00E-04 | 0.4499   | 460826 | 0.5193 | -0.0019 | 3.00E-04 | 4.72E-14  | 1195190 | 0.4846 | -2.00E-04 | 5.00E-04 | 0.6776   | 850634 |
| rs9376148  | C | A |      | 0.64   | -0.0016   | 5.00E-04 | 0.0007   | 460826 | 0.3633 | -0.0015 | 3.00E-04 | 3.36E-09  | 1014420 | 0.6343 | 7.00E-04  | 5.00E-04 | 0.1373   | 802037 |
| rs9397738  | G | A |      | 0.8583 | -0.0035   | 7.00E-04 | 1.18E-07 | 460826 | 0.1526 | -0.003  | 4.00E-04 | 3.15E-17  | 1182520 | 0.8421 | 0.0033    | 7.00E-04 | 1.78E-06 | 834924 |
| rs9465741  | C | A |      | 0.5408 | -0.0027   | 5.00E-04 | 5.80E-09 | 460826 | 0.4843 | -0.0021 | 3.00E-04 | 1.91E-16  | 1158670 | 0.5127 | 7.00E-04  | 5.00E-04 | 0.1587   | 809561 |
| rs9480867  | G | A |      | 0.1574 | -0.0025   | 6.00E-04 | 9.39E-05 | 460826 | 0.847  | -0.0034 | 3.00E-04 | 9.81E-23  | 1199200 | 0.1542 | 0.0011    | 7.00E-04 | 0.1034   | 851400 |
| rs948494   | A | G |      | 0.3382 | -0.0055   | 5.00E-04 | 1.33E-29 | 460826 | 0.3357 | -0.0034 | 3.00E-04 | 7.89E-40  | 1201890 | 0.3308 | -0.0034   | 5.00E-04 | 2.08E-10 | 852643 |
| rs950965   | A | G |      | 0.3479 | -0.0033   | 5.00E-04 | 1.07E-11 | 460826 | 0.3808 | -0.0018 | 3.00E-04 | 4.70E-12  | 1159620 | 0.3938 | 0.002     | 5.00E-04 | 8.84E-05 | 810512 |
| rs9521719  | A | G |      | 0.3994 | -0.0023   | 5.00E-04 | 6.46E-07 | 460826 | 0.3945 | -0.0019 | 3.00E-04 | 4.79E-14  | 1195370 | 0.3959 | 0.001     | 5.00E-04 | 0.03438  | 851851 |
| rs953492   | A | G |      | 0.4644 | -0.0026   | 5.00E-04 | 1.39E-08 | 460826 | 0.4518 | -0.0027 | 3.00E-04 | 1.09E-25  | 1196020 | 0.451  | 0.0018    | 5.00E-04 | 0.000167 | 852504 |
| rs956006   | C | T |      | 0.3235 | -0.0012   | 5.00E-04 | 0.01411  | 460826 | 0.6712 | -0.0017 | 3.00E-04 | 1.10E-10  | 1158520 | 0.3244 | 8.00E-04  | 5.00E-04 | 0.1302   | 809417 |
| rs9590675  | G | T |      | 0.3975 | -0.0021   | 5.00E-04 | 7.96E-06 | 460826 | 0.5858 | -0.0021 | 3.00E-04 | 1.72E-16  | 1196300 | 0.4137 | 0.0026    | 5.00E-04 | 1.87E-07 | 851729 |
| rs963837   | T | C |      | 0.551  | -0.0067   | 5.00E-04 | 1.09E-47 | 460826 | 0.5595 | -0.0055 | 3.00E-04 | 9.85E-102 | 1154860 | 0.562  | 0.0087    | 5.00E-04 | 1.12E-64 | 806956 |
| rs9649512  | G | A |      | 0.2895 | -0.0041   | 5.00E-04 | 6.44E-16 | 460826 | 0.7117 | -0.0025 | 3.00E-04 | 7.29E-16  | 898939  | 0.2895 | -0.0016   | 6.00E-04 | 0.007735 | 619781 |
| rs965484   | C | T |      | 0.4313 | -0.0048   | 5.00E-04 | 1.28E-24 | 460826 | 0.5716 | -0.0026 | 3.00E-04 | 7.41E-25  | 1201920 | 0.4238 | 0.0025    | 5.00E-04 | 2.73E-07 | 852666 |
| rs9663482  | C | G |      | 0.1715 | -0.0027   | 6.00E-04 | 1.51E-05 | 460826 | 0.1963 | -0.0024 | 3.00E-04 | 2.77E-12  | 1201920 | 0.2032 | 0.0025    | 6.00E-04 | 3.01E-05 | 852675 |
| rs9807214  | A | G |      | 0.2975 | -0.0025   | 5.00E-04 | 8.45E-07 | 460826 | 0.2923 | -0.0022 | 3.00E-04 | 2.73E-13  | 1201920 | 0.2896 | -0.0042   | 5.00E-04 | 1.33E-14 | 852668 |
| rs9812319  | C | T |      | 0.3388 | -0.0041   | 5.00E-04 | 2.29E-17 | 460826 | 0.6652 | -0.0022 | 3.00E-04 | 1.12E-17  | 1196300 | 0.337  | 0.0053    | 5.00E-04 | 2.93E-23 | 851729 |
| rs9823161  | G | A |      | 0.6804 | -0.0036   | 5.00E-04 | 4.95E-13 | 460826 | 0.3578 | -0.0025 | 3.00E-04 | 3.52E-16  | 1120110 | 0.6287 | 0.0029    | 5.00E-04 | 6.85E-08 | 810512 |
| rs9894634  | T | C |      | 0.5988 | -0.0014   | 5.00E-04 | 0.002149 | 460826 | 0.5724 | -0.0019 | 3.00E-04 | 3.66E-14  | 1200730 | 0.5622 | 0.0015    | 5.00E-04 | 0.003213 | 851493 |
| rs9895661  | C | T |      | 0.8205 | -0.0031   | 6.00E-04 | 2.78E-07 | 460826 | 0.2302 | -0.0077 | 3.00E-04 | 2.51E-114 | 1191460 | 0.7515 | -0.0019   | 6.00E-04 | 0.001361 | 848352 |
| rs9932625  | A | G |      | 0.23   | -0.0046   | 5.00E-04 | 2.76E-17 | 460826 | 0.2485 | -0.0033 | 3.00E-04 | 1.15E-32  | 1201590 | 0.2468 | 0.0038    | 6.00E-04 | 4.63E-11 | 852345 |
| rs9943067  | T | C |      | 0.4216 | -0.0022   | 5.00E-04 | 2.21E-06 | 460826 | 0.4264 | -0.0019 | 3.00E-04 | 3.76E-13  | 1060060 | 0.4284 | 0.0014    | 5.00E-04 | 0.006425 | 768291 |
| rs9998449  | G | A | TRUE | 0.6983 | -6.00E-04 | 5.00E-04 | 0.2069   | 460826 | 0.3274 | -0.0017 | 3.00E-04 | 1.87E-10  | 1199440 | 0.6676 | 3.00E-04  | 5.00E-04 | 0.5516   | 851327 |

Supplemental Table 3. Localized averaged causal estimates calculated from 100 percentile ranges of strata according to the instrument-free exposure.

| eGFR percentile | Age, sex, and 10 PCs adjusted |            |             |         |                   |            |             |         | Age, sex, 10 PCs, and clinical covariates adjusted |            |             |         |                   |            |             |         |
|-----------------|-------------------------------|------------|-------------|---------|-------------------|------------|-------------|---------|----------------------------------------------------|------------|-------------|---------|-------------------|------------|-------------|---------|
|                 | eGFR (creatinine)             |            |             |         | eGFR (cystatin C) |            |             |         | eGFR (creatinine)                                  |            |             |         | eGFR (cystatin C) |            |             |         |
|                 | OR                            | low 95% CI | high 95% CI | P value | OR                | low 95% CI | high 95% CI | P value | OR                                                 | low 95% CI | high 95% CI | P value | OR                | low 95% CI | high 95% CI | P value |
| 1               | 0.960                         | 0.914      | 1.009       | 0.107   | 0.994             | 0.961      | 1.029       | 0.745   | 0.940                                              | 0.878      | 1.007       | 0.077   | 0.973             | 0.927      | 1.022       | 0.273   |
| 2               | 0.967                         | 0.910      | 1.029       | 0.290   | 0.958             | 0.921      | 0.997       | 0.033   | 1.048                                              | 0.964      | 1.140       | 0.268   | 0.997             | 0.943      | 1.053       | 0.902   |
| 3               | 0.981                         | 0.916      | 1.050       | 0.580   | 0.972             | 0.931      | 1.015       | 0.202   | 0.894                                              | 0.814      | 0.983       | 0.021   | 0.948             | 0.891      | 1.008       | 0.086   |
| 4               | 0.943                         | 0.879      | 1.012       | 0.105   | 1.016             | 0.969      | 1.064       | 0.520   | 1.009                                              | 0.914      | 1.115       | 0.852   | 1.025             | 0.955      | 1.100       | 0.496   |
| 5               | 0.990                         | 0.920      | 1.065       | 0.787   | 0.952             | 0.909      | 0.998       | 0.040   | 0.957                                              | 0.873      | 1.049       | 0.348   | 0.994             | 0.932      | 1.060       | 0.856   |
| 6               | 1.017                         | 0.947      | 1.091       | 0.649   | 0.967             | 0.921      | 1.016       | 0.184   | 1.012                                              | 0.921      | 1.111       | 0.811   | 0.915             | 0.855      | 0.981       | 0.012   |
| 7               | 0.962                         | 0.896      | 1.034       | 0.295   | 0.992             | 0.945      | 1.041       | 0.734   | 0.969                                              | 0.870      | 1.080       | 0.573   | 1.013             | 0.946      | 1.085       | 0.706   |
| 8               | 0.936                         | 0.866      | 1.012       | 0.098   | 0.933             | 0.885      | 0.984       | 0.010   | 0.918                                              | 0.833      | 1.013       | 0.088   | 0.986             | 0.916      | 1.061       | 0.706   |
| 9               | 1.063                         | 0.987      | 1.146       | 0.108   | 1.010             | 0.958      | 1.065       | 0.704   | 1.021                                              | 0.920      | 1.132       | 0.699   | 0.928             | 0.864      | 0.996       | 0.040   |
| 10              | 0.960                         | 0.885      | 1.043       | 0.334   | 0.999             | 0.950      | 1.052       | 0.982   | 0.998                                              | 0.904      | 1.100       | 0.960   | 1.077             | 0.994      | 1.167       | 0.071   |
| 11              | 1.059                         | 0.982      | 1.143       | 0.137   | 0.973             | 0.923      | 1.025       | 0.305   | 1.020                                              | 0.919      | 1.131       | 0.713   | 0.941             | 0.868      | 1.019       | 0.134   |
| 12              | 0.991                         | 0.914      | 1.075       | 0.833   | 1.025             | 0.972      | 1.081       | 0.363   | 0.998                                              | 0.901      | 1.105       | 0.969   | 1.063             | 0.985      | 1.147       | 0.117   |
| 13              | 0.966                         | 0.881      | 1.059       | 0.457   | 0.998             | 0.946      | 1.052       | 0.932   | 1.075                                              | 0.962      | 1.202       | 0.203   | 0.993             | 0.920      | 1.072       | 0.865   |
| 14              | 0.993                         | 0.917      | 1.075       | 0.862   | 0.968             | 0.918      | 1.020       | 0.222   | 1.053                                              | 0.951      | 1.166       | 0.318   | 1.023             | 0.946      | 1.106       | 0.572   |
| 15              | 0.975                         | 0.903      | 1.053       | 0.521   | 0.985             | 0.932      | 1.042       | 0.603   | 0.922                                              | 0.831      | 1.024       | 0.128   | 0.955             | 0.888      | 1.028       | 0.220   |
| 16              | 1.010                         | 0.935      | 1.092       | 0.800   | 1.008             | 0.957      | 1.061       | 0.765   | 1.148                                              | 1.018      | 1.293       | 0.024   | 1.005             | 0.934      | 1.081       | 0.890   |
| 17              | 0.998                         | 0.917      | 1.085       | 0.957   | 1.022             | 0.968      | 1.079       | 0.431   | 0.918                                              | 0.823      | 1.023       | 0.122   | 1.119             | 1.034      | 1.211       | 0.005   |
| 18              | 0.948                         | 0.875      | 1.027       | 0.191   | 1.002             | 0.951      | 1.057       | 0.936   | 0.961                                              | 0.861      | 1.073       | 0.480   | 1.024             | 0.949      | 1.105       | 0.537   |
| 19              | 1.037                         | 0.951      | 1.131       | 0.414   | 0.986             | 0.933      | 1.042       | 0.612   | 0.890                                              | 0.791      | 1.001       | 0.053   | 0.998             | 0.927      | 1.075       | 0.962   |
| 20              | 0.978                         | 0.900      | 1.062       | 0.595   | 1.048             | 0.989      | 1.110       | 0.115   | 0.900                                              | 0.810      | 0.999       | 0.048   | 1.013             | 0.937      | 1.095       | 0.745   |
| 21              | 0.956                         | 0.885      | 1.032       | 0.246   | 1.054             | 0.989      | 1.124       | 0.108   | 1.032                                              | 0.924      | 1.153       | 0.578   | 1.003             | 0.921      | 1.091       | 0.950   |
| 22              | 0.986                         | 0.907      | 1.072       | 0.740   | 0.977             | 0.922      | 1.036       | 0.445   | 0.960                                              | 0.864      | 1.065       | 0.439   | 1.012             | 0.934      | 1.096       | 0.771   |
| 23              | 0.999                         | 0.922      | 1.081       | 0.972   | 1.029             | 0.970      | 1.092       | 0.342   | 0.904                                              | 0.809      | 1.012       | 0.079   | 1.050             | 0.975      | 1.131       | 0.199   |
| 24              | 0.979                         | 0.901      | 1.064       | 0.620   | 0.985             | 0.932      | 1.040       | 0.576   | 1.082                                              | 0.973      | 1.202       | 0.145   | 1.018             | 0.944      | 1.098       | 0.642   |
| 25              | 1.002                         | 0.917      | 1.094       | 0.970   | 0.964             | 0.910      | 1.021       | 0.209   | 0.918                                              | 0.827      | 1.019       | 0.107   | 0.937             | 0.869      | 1.009       | 0.085   |
| 26              | 1.103                         | 1.015      | 1.199       | 0.021   | 0.966             | 0.914      | 1.021       | 0.222   | 0.975                                              | 0.880      | 1.080       | 0.629   | 0.991             | 0.919      | 1.069       | 0.821   |
| 27              | 1.019                         | 0.940      | 1.104       | 0.652   | 0.968             | 0.910      | 1.029       | 0.295   | 0.993                                              | 0.885      | 1.114       | 0.903   | 0.970             | 0.891      | 1.057       | 0.487   |
| 28              | 0.981                         | 0.897      | 1.073       | 0.674   | 0.988             | 0.934      | 1.045       | 0.676   | 1.143                                              | 1.032      | 1.265       | 0.010   | 0.958             | 0.886      | 1.036       | 0.279   |
| 29              | 0.950                         | 0.873      | 1.035       | 0.241   | 0.962             | 0.907      | 1.020       | 0.193   | 0.967                                              | 0.856      | 1.093       | 0.594   | 1.027             | 0.948      | 1.112       | 0.511   |
| 30              | 0.998                         | 0.919      | 1.084       | 0.966   | 0.995             | 0.937      | 1.056       | 0.868   | 1.104                                              | 0.983      | 1.241       | 0.096   | 1.007             | 0.931      | 1.088       | 0.870   |
| 31              | 0.968                         | 0.886      | 1.058       | 0.475   | 1.046             | 0.990      | 1.105       | 0.110   | 1.009                                              | 0.902      | 1.128       | 0.880   | 1.009             | 0.936      | 1.088       | 0.816   |
| 32              | 0.947                         | 0.871      | 1.029       | 0.200   | 1.056             | 0.992      | 1.125       | 0.089   | 1.020                                              | 0.914      | 1.137       | 0.725   | 0.998             | 0.928      | 1.074       | 0.964   |
| 33              | 0.973                         | 0.898      | 1.054       | 0.502   | 1.011             | 0.952      | 1.073       | 0.730   | 1.022                                              | 0.908      | 1.151       | 0.717   | 1.032             | 0.957      | 1.114       | 0.415   |
| 34              | 1.018                         | 0.933      | 1.110       | 0.686   | 1.061             | 0.995      | 1.132       | 0.070   | 1.032                                              | 0.935      | 1.140       | 0.530   | 1.007             | 0.926      | 1.094       | 0.874   |
| 35              | 1.058                         | 0.982      | 1.141       | 0.140   | 1.020             | 0.960      | 1.083       | 0.530   | 0.994                                              | 0.899      | 1.098       | 0.900   | 1.007             | 0.912      | 1.111       | 0.897   |
| 36              | 1.003                         | 0.923      | 1.091       | 0.936   | 0.930             | 0.877      | 0.986       | 0.015   | 0.982                                              | 0.882      | 1.094       | 0.739   | 1.016             | 0.939      | 1.098       | 0.697   |
| 37              | 1.057                         | 0.966      | 1.156       | 0.228   | 1.006             | 0.953      | 1.062       | 0.818   | 0.962                                              | 0.862      | 1.073       | 0.487   | 0.972             | 0.901      | 1.049       | 0.463   |
| 38              | 0.959                         | 0.883      | 1.042       | 0.324   | 0.942             | 0.886      | 1.002       | 0.056   | 0.976                                              | 0.884      | 1.078       | 0.628   | 0.975             | 0.893      | 1.066       | 0.582   |
| 39              | 1.013                         | 0.932      | 1.101       | 0.766   | 1.020             | 0.959      | 1.085       | 0.529   | 1.011                                              | 0.916      | 1.115       | 0.833   | 0.968             | 0.885      | 1.058       | 0.468   |
| 40              | 0.976                         | 0.902      | 1.056       | 0.543   | 1.022             | 0.958      | 1.091       | 0.501   | 1.001                                              | 0.904      | 1.109       | 0.981   | 0.965             | 0.897      | 1.039       | 0.349   |
| 41              | 0.975                         | 0.901      | 1.055       | 0.525   | 0.997             | 0.934      | 1.065       | 0.929   | 0.953                                              | 0.858      | 1.057       | 0.360   | 0.919             | 0.846      | 0.999       | 0.048   |
| 42              | 1.000                         | 0.924      | 1.083       | 0.997   | 1.016             | 0.960      | 1.076       | 0.578   | 1.011                                              | 0.906      | 1.130       | 0.840   | 1.025             | 0.943      | 1.115       | 0.558   |
| 43              | 0.980                         | 0.908      | 1.058       | 0.605   | 0.998             | 0.938      | 1.061       | 0.938   | 1.023                                              | 0.920      | 1.138       | 0.675   | 0.989             | 0.908      | 1.078       | 0.798   |
| 44              | 1.037                         | 0.953      | 1.127       | 0.401   | 0.994             | 0.935      | 1.056       | 0.840   | 1.031                                              | 0.933      | 1.139       | 0.552   | 0.995             | 0.914      | 1.082       | 0.900   |
| 45              | 0.950                         | 0.879      | 1.027       | 0.198   | 1.016             | 0.957      | 1.079       | 0.603   | 1.009                                              | 0.898      | 1.134       | 0.877   | 0.932             | 0.851      | 1.020       | 0.124   |
| 46              | 0.960                         | 0.885      | 1.041       | 0.325   | 0.970             | 0.909      | 1.034       | 0.343   | 0.943                                              | 0.850      | 1.046       | 0.269   | 0.968             | 0.888      | 1.054       | 0.454   |
| 47              | 1.007                         | 0.937      | 1.083       | 0.847   | 1.011             | 0.946      | 1.082       | 0.739   | 1.028                                              | 0.928      | 1.139       | 0.598   | 0.983             | 0.903      | 1.069       | 0.686   |
| 48              | 0.987                         | 0.909      | 1.072       | 0.760   | 0.945             | 0.887      | 1.007       | 0.080   | 1.011                                              | 0.905      | 1.128       | 0.852   | 1.012             | 0.917      | 1.116       | 0.815   |
| 49              | 1.014                         | 0.936      | 1.099       | 0.727   | 1.046             | 0.976      | 1.120       | 0.206   | 1.058                                              | 0.947      | 1.182       | 0.318   | 1.044             | 0.958      | 1.137       | 0.325   |
| 50              | 0.916                         | 0.844      | 0.994       | 0.034   | 1.030             | 0.968      | 1.096       | 0.349   | 1.010                                              | 0.906      | 1.127       | 0.853   | 0.988             | 0.908      | 1.075       | 0.780   |
| 51              | 1.019                         | 0.934      | 1.111       | 0.674   | 1.071             | 1.000      | 1.146       | 0.050   | 1.015                                              | 0.914      | 1.128       | 0.777   | 0.995             | 0.909      | 1.090       | 0.918   |
| 52              | 1.062                         | 0.974      | 1.158       | 0.174   | 0.979             | 0.918      | 1.044       | 0.515   | 0.987                                              | 0.875      | 1.114       | 0.836   | 1.014             | 0.930      | 1.107       | 0.748   |
| 53              | 1.003                         | 0.919      | 1.096       | 0.940   | 1.002             | 0.939      | 1.069       | 0.952   | 1.001                                              | 0.895      | 1.121       | 0.979   | 1.071             | 0.975      | 1.176       | 0.151   |
| 54              | 0.962                         | 0.883      | 1.048       | 0.375   | 0.975             | 0.914      | 1.040       | 0.436   | 0.980                                              | 0.876      | 1.096       | 0.719   | 1.069             | 0.982      | 1.163       | 0.124   |
| 55              | 1.007                         | 0.925      | 1.097       | 0.866   | 0.984             | 0.920      | 1.053       | 0.646   | 0.980                                              | 0.856      | 1.123       | 0.773   | 0.985             | 0.898      | 1.081       | 0.750   |
| 56              | 0.972                         | 0.883      | 1.071       | 0.569   | 1.033             | 0.964      | 1.107       | 0.356   | 0.940                                              | 0.831      | 1.064       | 0.328   | 1.088             | 1.003      | 1.179       | 0.041   |
| 57              | 1.058                         | 0.972      | 1.152       | 0.194   | 1.018             | 0.949      | 1.091       | 0.622   | 1.066                                              | 0.944      | 1.204       | 0.300   | 1.041             | 0.951      | 1.140       | 0.384   |
| 58              | 0.979                         | 0.887      | 1.081       | 0.680   | 0.927             | 0.867      | 0.992       | 0.027   | 1.006                                              | 0.899      | 1.126       | 0.912   | 0.965             | 0.875      | 1.065       | 0.478   |
| 59              | 1.025                         | 0.922      | 1.139       | 0.646   | 1.044             | 0.977      | 1.115       | 0.203   | 0.969                                              | 0.854      | 1.099       | 0.623   | 1.014             | 0.926      | 1.109       | 0.770   |
| 60              | 0.925                         | 0.839      | 1.020       | 0.120   | 1.002             | 0.937      | 1.071       | 0.962   | 0.945                                              | 0.828      | 1.078       | 0.917   | 0.952             | 0.867      | 1.046       | 0.307   |
| 61              | 0.956                         | 0.871      | 1.050       | 0.349   | 1.007             | 0.940      | 1.079       | 0.839   | 1.203                                              | 1.040      | 1.393       | 0.013   | 1.024             | 0.918      | 1.142       | 0.676   |
| 62              | 1.140                         | 1.032      | 1.260       | 0.010   | 0.962             | 0.896      | 1.033       | 0.287   | 1.104                                              | 0.968      | 1.259       | 0.140   | 0.919             | 0.834      | 1.013       | 0.088   |
| 63              | 1.017                         | 0.919      | 1.126       | 0.738   | 0.980             | 0.909      | 1.056       | 0.593   | 1.078                                              | 0.958      | 1.212       | 0.211   | 0.969             | 0.885      | 1.060       | 0.487   |
| 64              | 1.019                         | 0.923      | 1.126       | 0.705   | 0.969             | 0.900      | 1.043       | 0.395   | 1.037                                              | 0.922      | 1.168       | 0.543   | 1.023             | 0.936      | 1.118       | 0.614   |
| 65              | 1.101                         | 1.000      | 1.213       | 0.050   | 0.973             | 0.898      | 1.055       | 0.512   | 1.159                                              | 1.018      | 1.320       | 0.026   | 1.062             | 0.969      | 1.164       | 0.195   |
| 66              | 1.012                         | 0.915      | 1.119       | 0.819   | 0.936             | 0.865      | 1.013       | 0.102   | 0.960                                              | 0.850      | 1.084       | 0.509   | 1.050             | 0.953      | 1.156       | 0.325   |
| 67              | 1.008                         | 0.909      | 1.118       | 0.884   | 1.018             | 0.948      | 1.093       | 0.623   | 1.058                                              | 0.937      | 1.194       | 0.361   | 0.948             | 0.864      | 1.041       | 0.264   |
| 68              | 0.982                         | 0.892      | 1.081       | 0.706   | 0.958             | 0.887      | 1.035       | 0.278   | 1.028                                              | 0.906      | 1.168       | 0.667   | 1.010             | 0.922      | 1.105       | 0.836   |
| 69              | 1.137                         | 1.028      | 1.257       | 0.013   | 1.006             | 0.936      | 1.081       | 0.881   | 1.040                                              | 0.918      | 1.178       | 0.536   | 0.979             | 0.890      | 1.076       | 0.655   |
| 70              | 1.072                         | 0.970      | 1.185       | 0.171   | 0.955             | 0.886      | 1.030       | 0.235   | 1.091                                              | 0.955      | 1.246       | 0       |                   |            |             |         |
